# Supplementary material for: Synthesis and Antinociceptive Effect of Some Thiazole-Piperazine Derivatives: Involvement of Opioidergic System in the Activity
Source: MDPI journal article supplement (doi:10.3390/molecules26113350), 2021-06-02
Supplement: s1 [file s1]

## DOPNALAB

| Item               | Value                                                         |
|--------------------|---------------------------------------------------------------|
| Acquired Date&Time | 13.04.2018 14:57:46                                           |
| Acquired by        | System Administrator                                          |
| Filename           | C:\Users\dopnalab\Desktop\denyalahmet osman tokay\GS-BOS1.lsp |
| Spectrum name      | GS-BOS1                                                       |
| Sample name        | GS-BOS                                                        |
| Sample ID          |                                                               |
| Option             |                                                               |
| Comment            |                                                               |
| No. of Scans       | 10                                                            |
| Resolution         | 4 [cm-1]                                                      |
| Apodization        | Happ-Genzel                                                   |

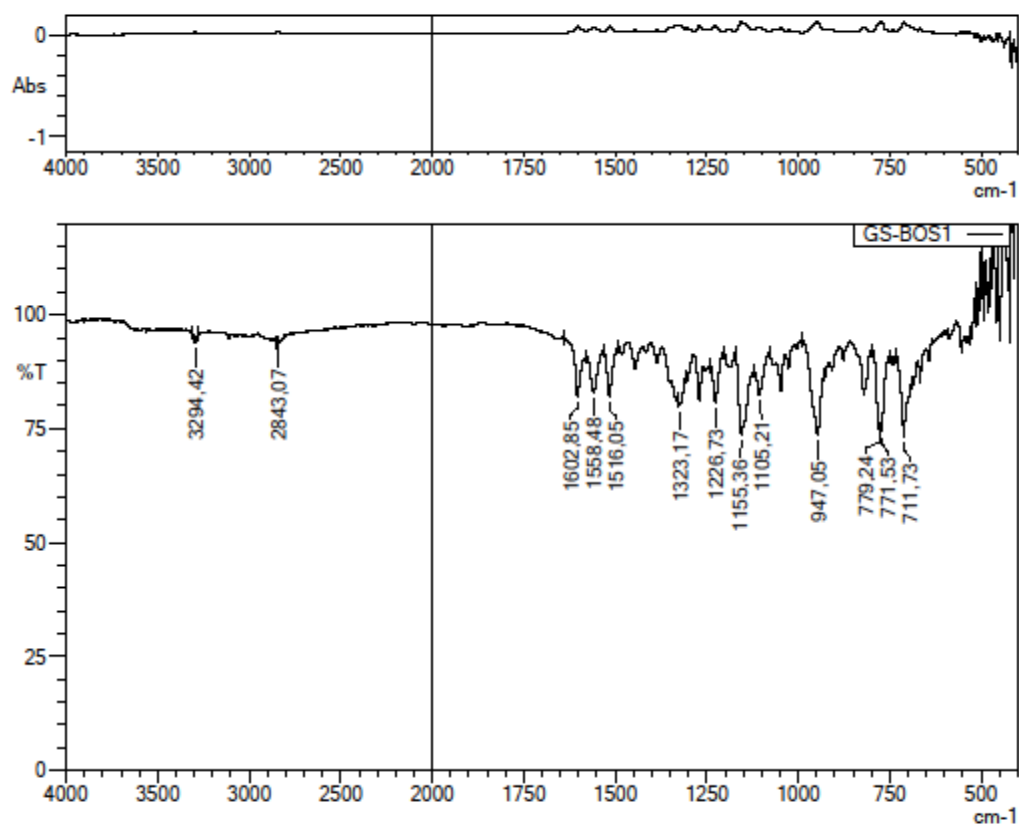

Figure S1. IR spectra of compound 3a.

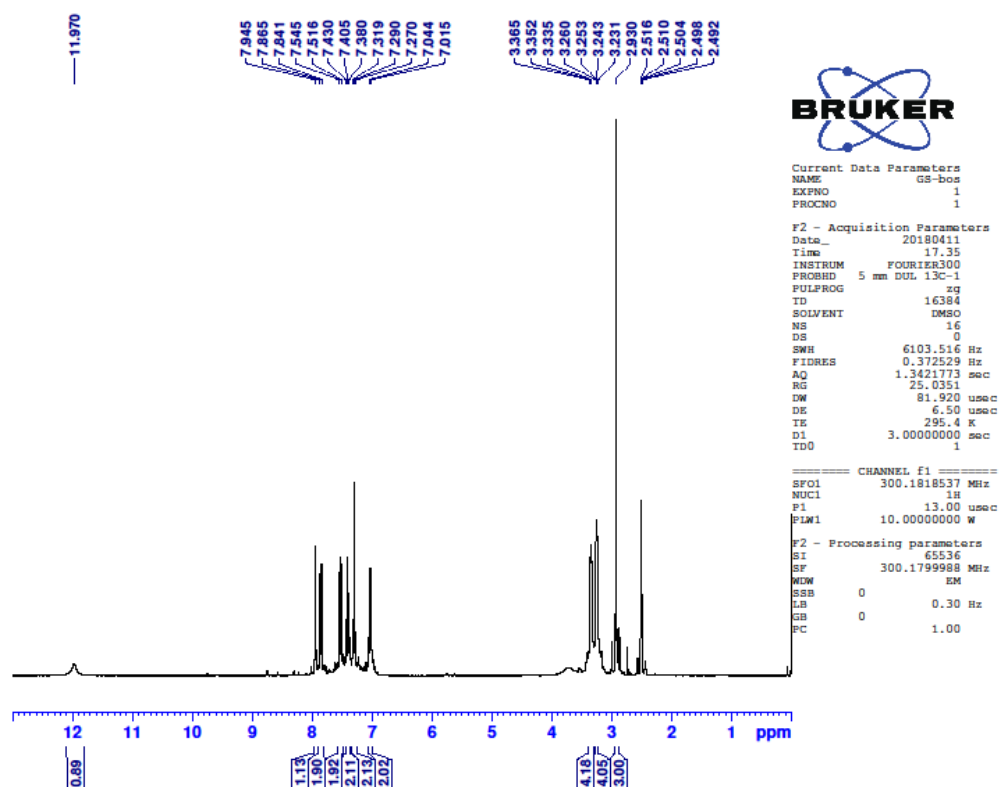

Figure S2. <sup>1</sup>H-NMR spectra of compound 3a.

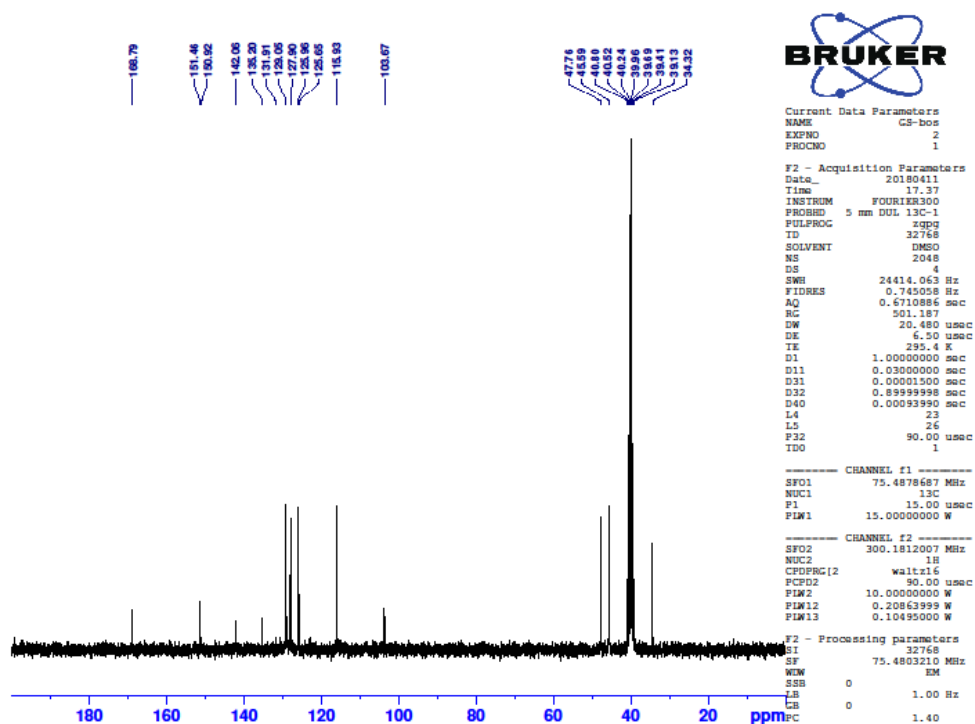

Figure S3. <sup>13</sup>C-NMR spectra of compound 3a.

## ==== Shimadzu LCMSsolution Analysis Report ====

Acquired by : Admin  
Sample Name : GS-Bos  
Sample ID :  
Vial # : 5  
Injection Volume : 0.3 uL  
Data File Name : GS-Bos\_19.lcd  
Method File Name : genel.lcm  
Batch File Name : batch.job  
Report File Name : DefaultLCMS.lcr  
Data Acquired : 19.04.2018 12:52:35  
Data Processed : 19.04.2018 13:03:39

## &lt;Chromatogram&gt;

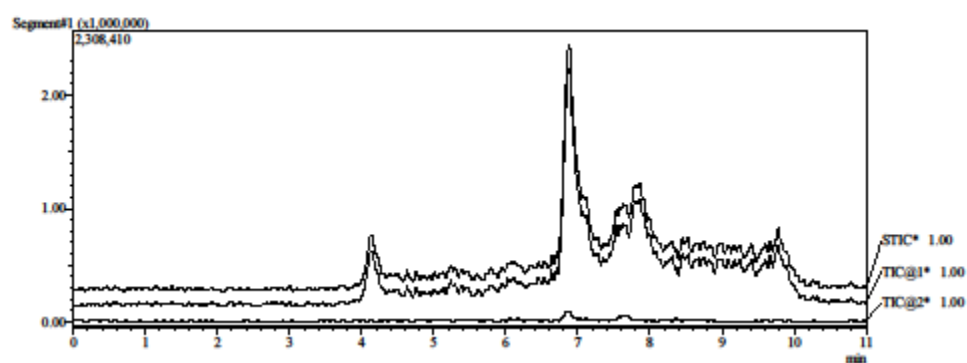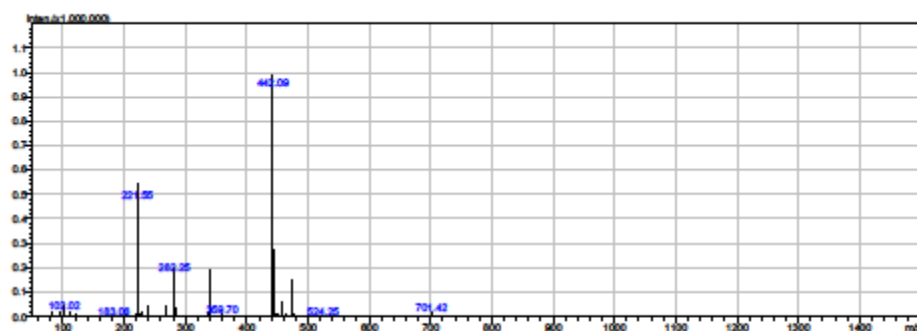

C:\LabSolutions\Data\Analiz\derya\GS-Bos\_19.lcd

Figure S4. LCMSMS spectra of compound 3a.

## DOPNALAB

| Item               | Value                                                         |
|--------------------|---------------------------------------------------------------|
| Acquired Date&Time | 13.04.2018 15:02:22                                           |
| Acquired by        | System Administrator                                          |
| Filename           | C:\Users\dopnalab\Desktop\denyalahmet osman tokay\GS-ME1.ispd |
| Spectrum name      | GS-ME1                                                        |
| Sample name        | GS-ME                                                         |
| Sample ID          |                                                               |
| Option             |                                                               |
| Comment            |                                                               |
| No. of Scans       | 10                                                            |
| Resolution         | 4 [cm-1]                                                      |
| Apodization        | Happ-Genzel                                                   |

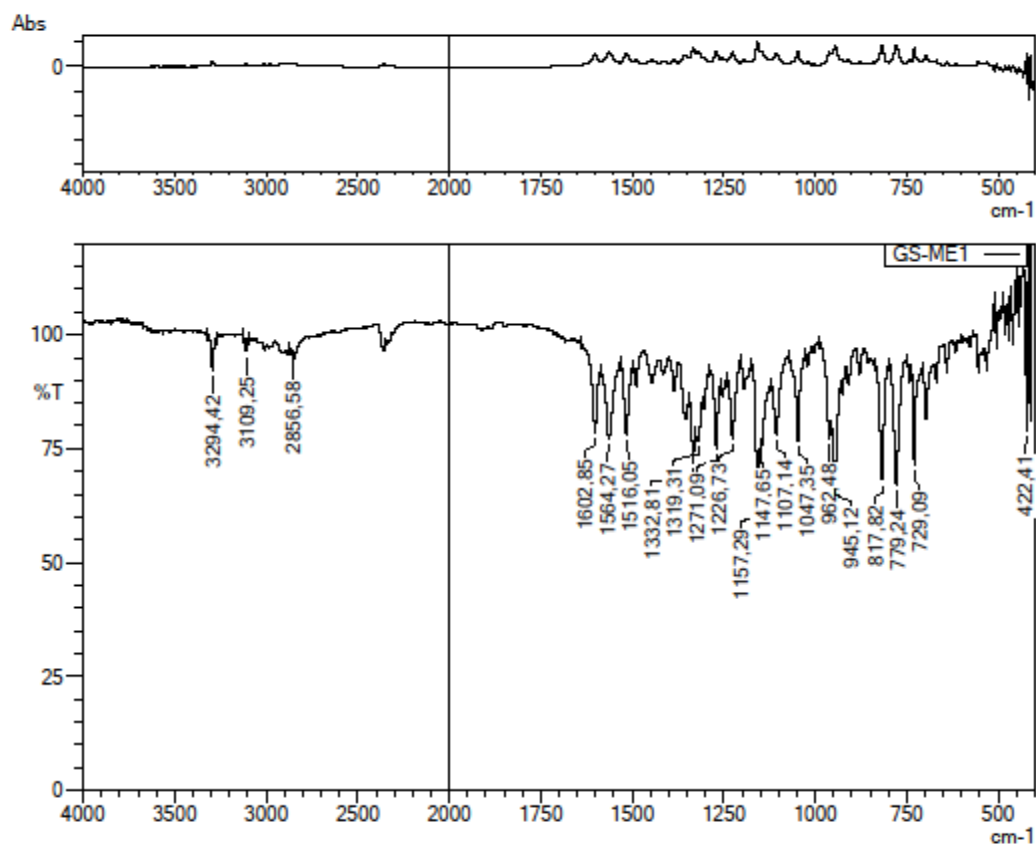

Figure S5. IR spectra of compound **3b**.





## ==== Shimadzu LCMSsolution Analysis Report ====

Acquired by : Admin  
Sample Name : GS-Me  
Sample ID :  
Vial # : 6  
Injection Volume : 0.3 uL  
Data File Name : GS-Me\_20.lcd  
Method File Name : genel.lcm  
Batch File Name : batch.lcb  
Report File Name : DefaultLCMS.lcr  
Data Acquired : 19.04.2018 13:04:10  
Data Processed : 19.04.2018 13:15:12

## &lt;Chromatogram&gt;

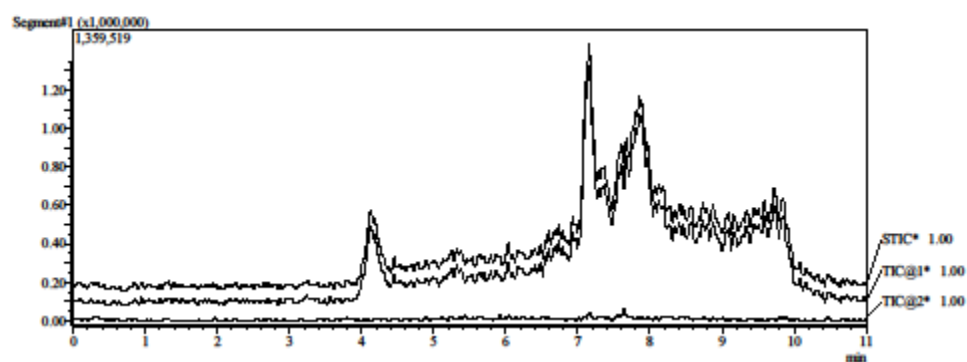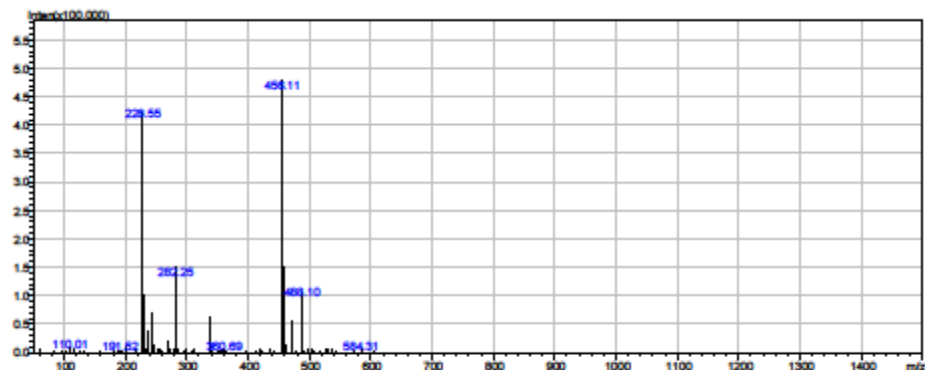

C:\LabSolutions\Data\Analiz\derya\GS-Me\_20.lcd

Figure S8. LCMSMS spectra of compound 3b.

## DOPNALAB

| Item               | Value                                                          |
|--------------------|----------------------------------------------------------------|
| Acquired Date&Time | 13.04.2018 15:04:31                                            |
| Acquired by        | System Administrator                                           |
| Filename           | C:\Users\dopnalab\Desktop\denyalahmet osman tokay\GS-OME1.lspd |
| Spectrum name      | GS-OME1                                                        |
| Sample name        | GS-OME                                                         |
| Sample ID          |                                                                |
| Option             |                                                                |
| Comment            |                                                                |
| No. of Scans       | 10                                                             |
| Resolution         | 4 [cm-1]                                                       |
| Apodization        | Happ-Genzel                                                    |

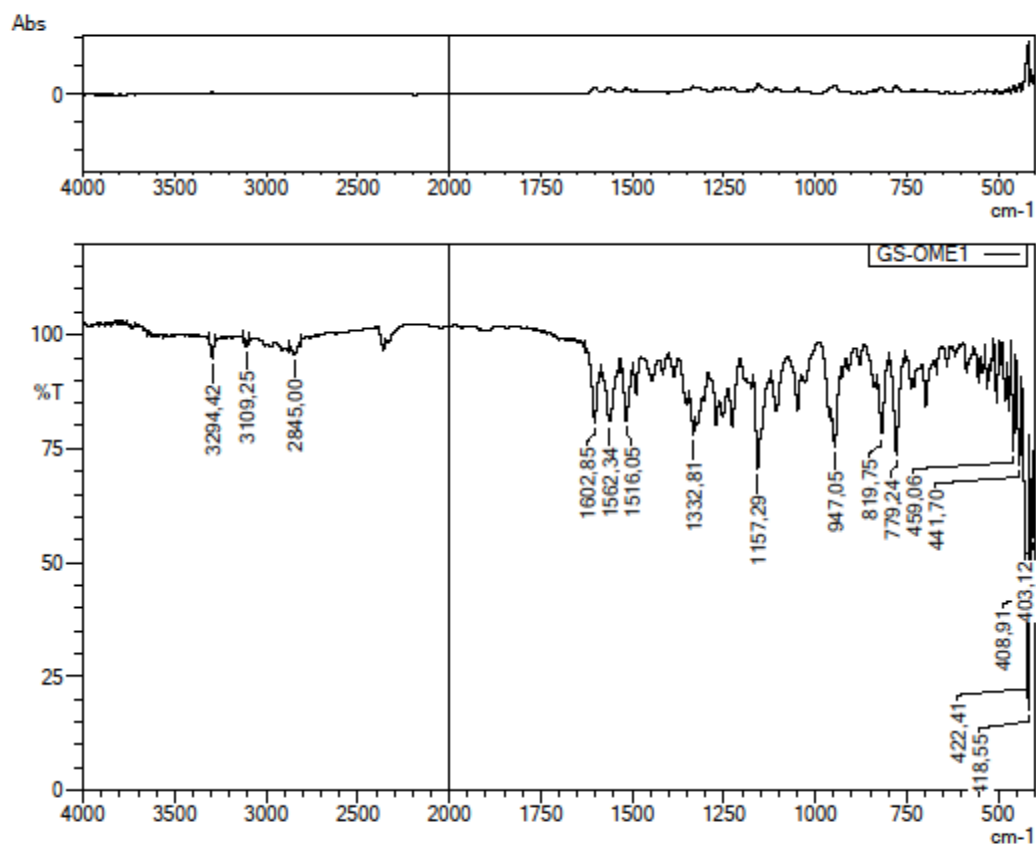

Figure S9. IR spectra of compound 3c.

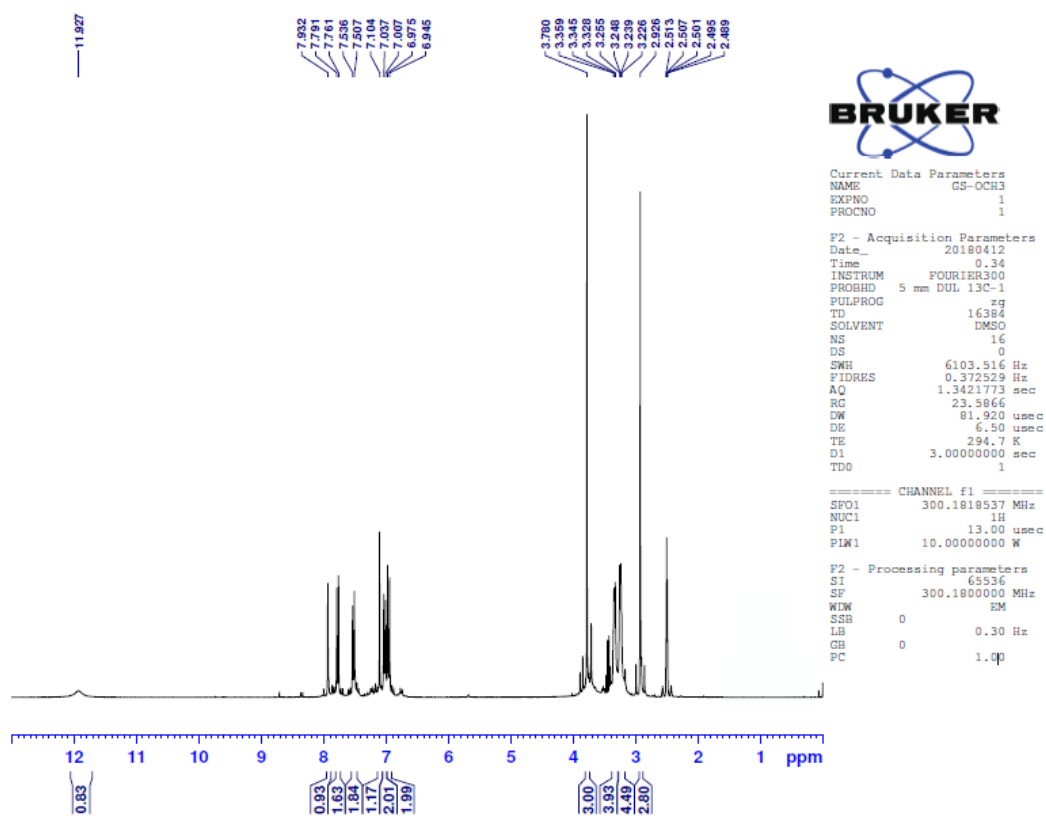

Figure S10. <sup>1</sup>H-NMR spectra of compound 3c.

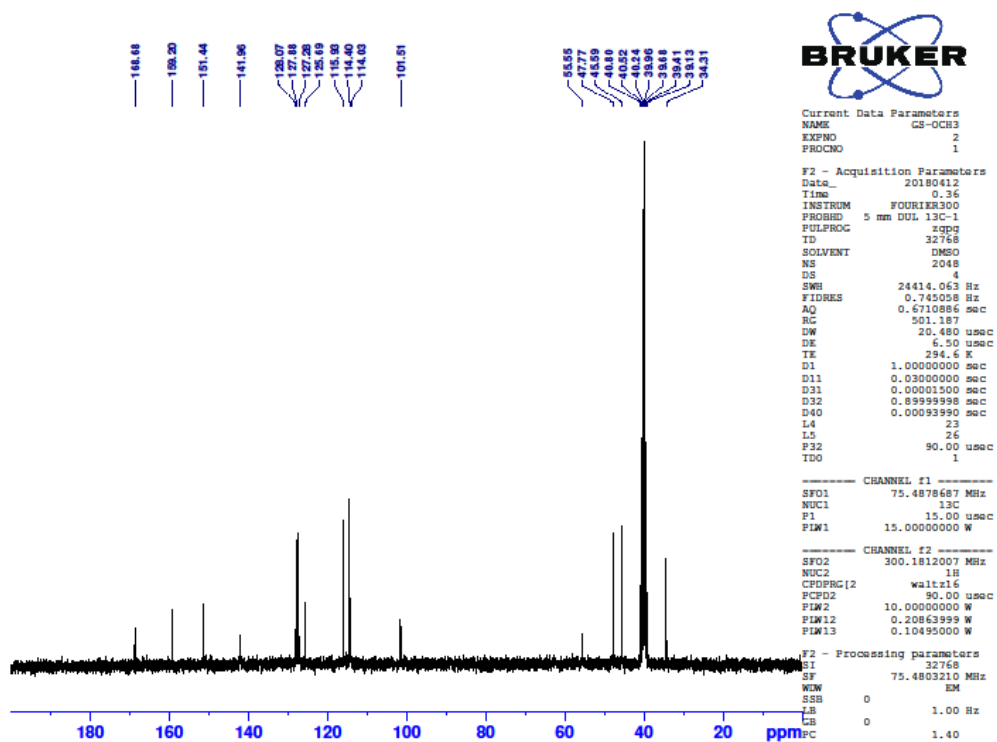

Figure S11. <sup>13</sup>C-NMR spectra of compound 3c.

## ==== Shimadzu LCMSsolution Analysis Report ====

Acquired by : Admin  
Sample Name : GS-OCH3  
Sample ID :  
Vial # : 1  
Injection Volume : 0.3 uL  
Data File Name : GS-OCH3\_15.lcd  
Method File Name : genel.lcm  
Batch File Name : batch.job  
Report File Name : DefaultLCMS.lcr  
Data Acquired : 19.04.2018 12:06:21  
Data Processed : 19.04.2018 12:17:24

## &lt;Chromatogram&gt;

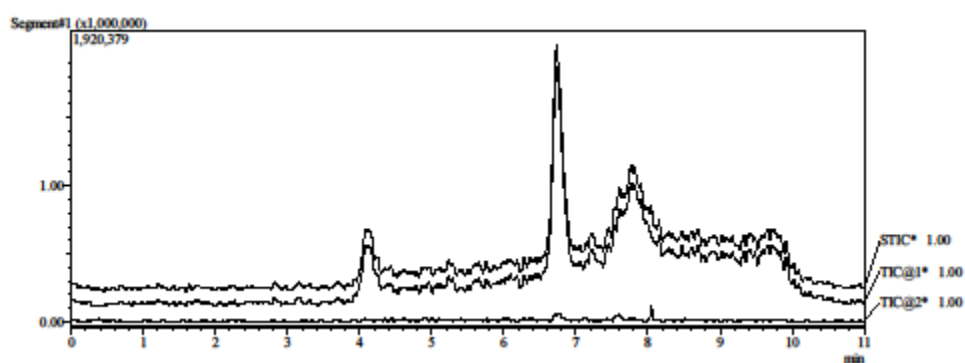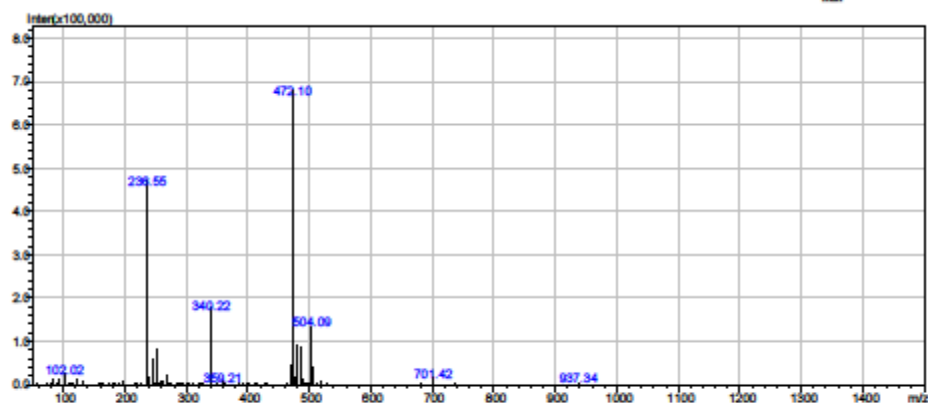

C:\LabSolutions\Data\Analiz\derya\GS-OCH3\_15.lcd

Figure S12. LCMSMS spectra of compound 3c.

## DOPNALAB

| Item               | Value                                                         |
|--------------------|---------------------------------------------------------------|
| Acquired Date&Time | 13.04.2018 15:09:08                                           |
| Acquired by        | System Administrator                                          |
| Filename           | C:\Users\dopnalab\Desktop\deniz\ahmet osman tokay\GS-CN1.ispd |
| Spectrum name      | GS-CN1                                                        |
| Sample name        | GS-CN                                                         |
| Sample ID          |                                                               |
| Option             |                                                               |
| Comment            |                                                               |
| No. of Scans       | 10                                                            |
| Resolution         | 4 [cm-1]                                                      |
| Apodization        | Happ-Genzel                                                   |

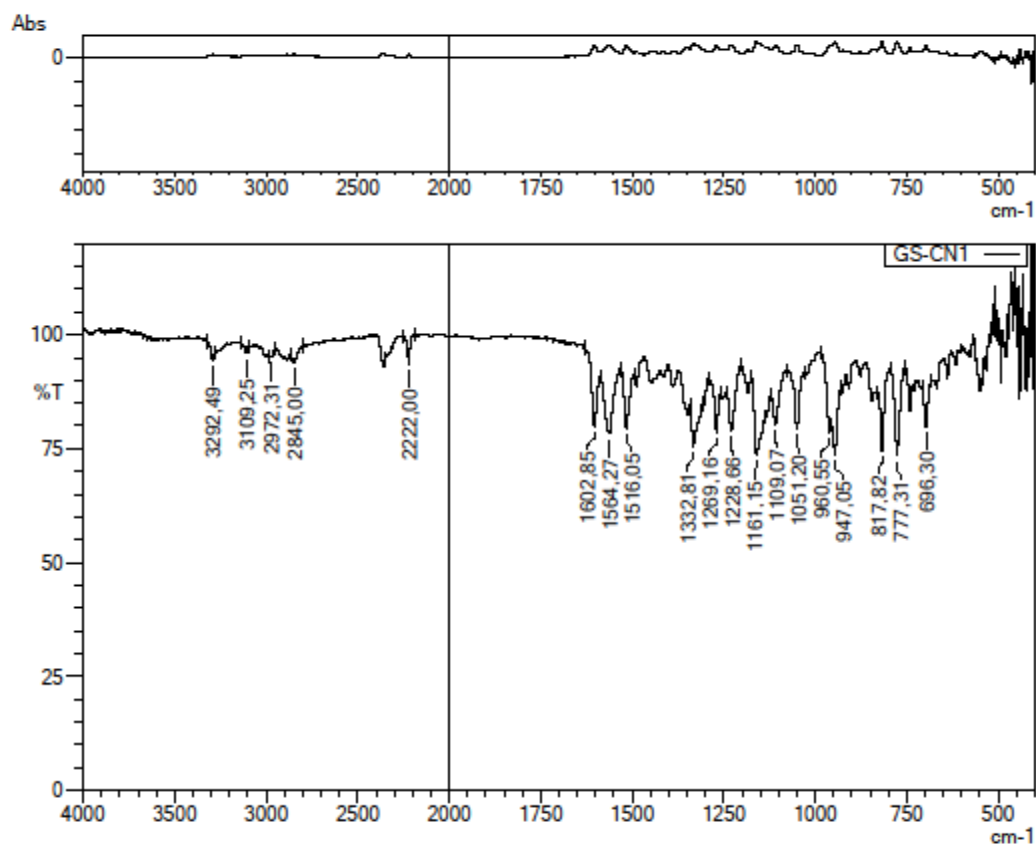

Figure S13. IR spectra of compound 3d.

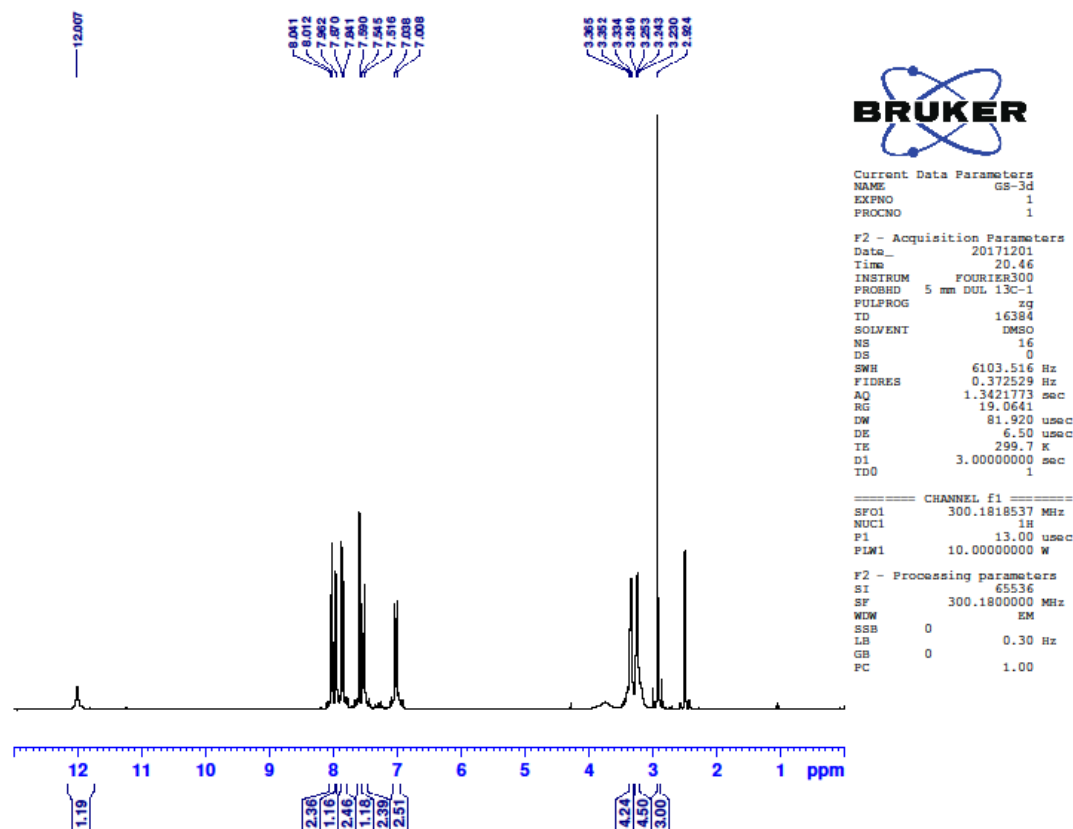

Figure S14. <sup>1</sup>H-NMR spectra of compound 3d.

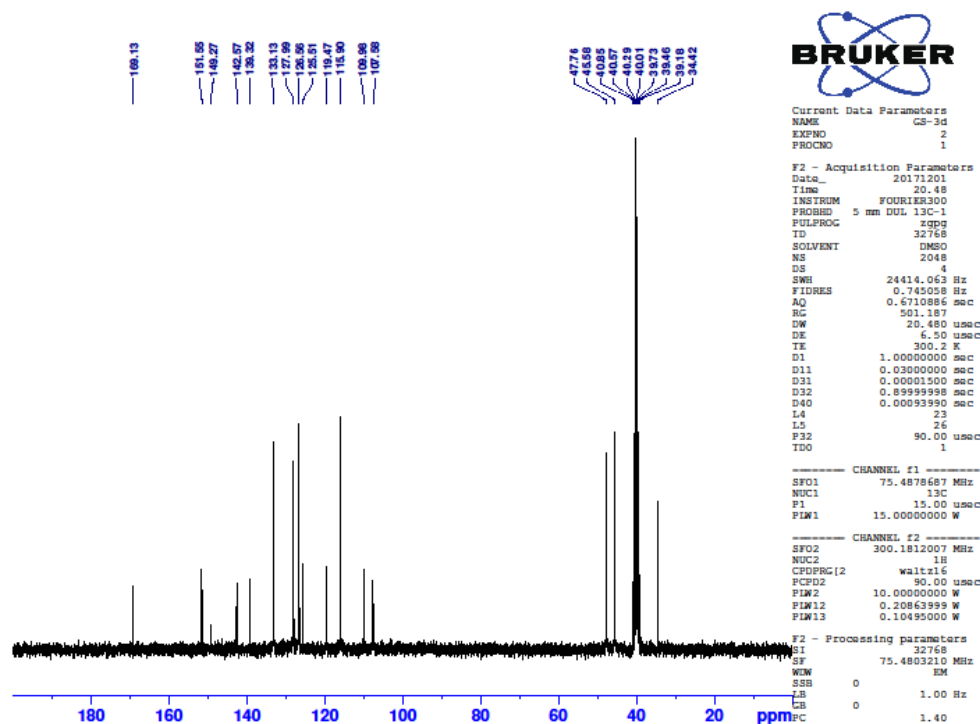

Figure S15. <sup>13</sup>C-NMR spectra of compound 3d.

## ==== Shimadzu LCMSsolution Analysis Report ====

Acquired by : Admin  
Sample Name : GS-CN  
Sample ID :  
Vial # : 7  
Injection Volume : 0.3 uL  
Data File Name : GS-CN\_21.lcd  
Method File Name : genel.lcm  
Batch File Name : batch.lcb  
Report File Name : DefaultLCMS.lcr  
Data Acquired : 19.04.2018 13:15:42  
Data Processed : 19.04.2018 13:26:44

## &lt;Chromatogram&gt;

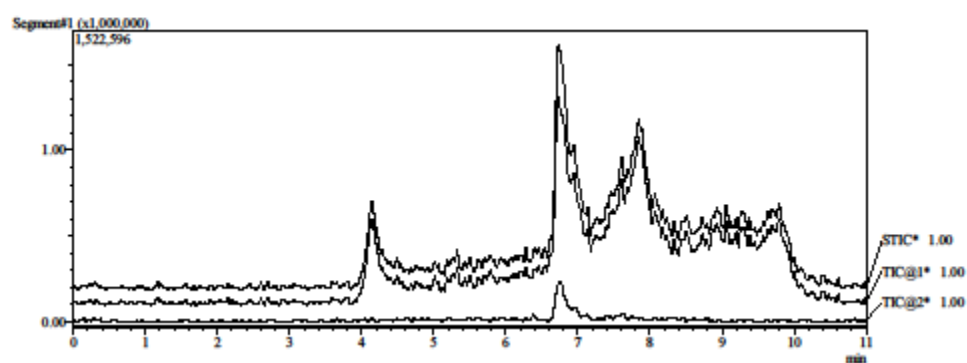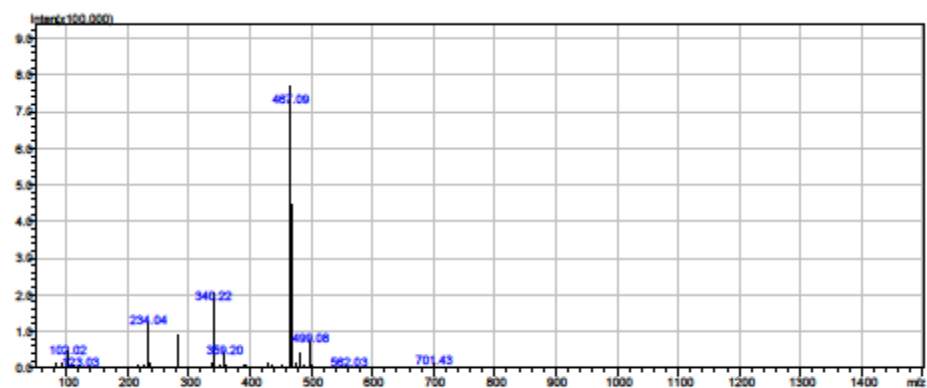

C:\LabSolutions\Data\Analiz\derya\GS-CN\_21.lcd

Figure S16. LCMSMS spectra of compound 3d.



## DOPNALAB

| Item               | Value                                                          |
|--------------------|----------------------------------------------------------------|
| Acquired Date&Time | 13.04.2018 15:12:32                                            |
| Acquired by        | System Administrator                                           |
| Filename           | C:\Users\dopnalab\Desktop\denyalahmet osman tokay\GS-NO21.lspd |
| Spectrum name      | GS-NO21                                                        |
| Sample name        | GS-NO2                                                         |
| Sample ID          |                                                                |
| Option             |                                                                |
| Comment            |                                                                |
| No. of Scans       | 10                                                             |
| Resolution         | 4 [cm-1]                                                       |
| Apodization        | Happ-Genzel                                                    |

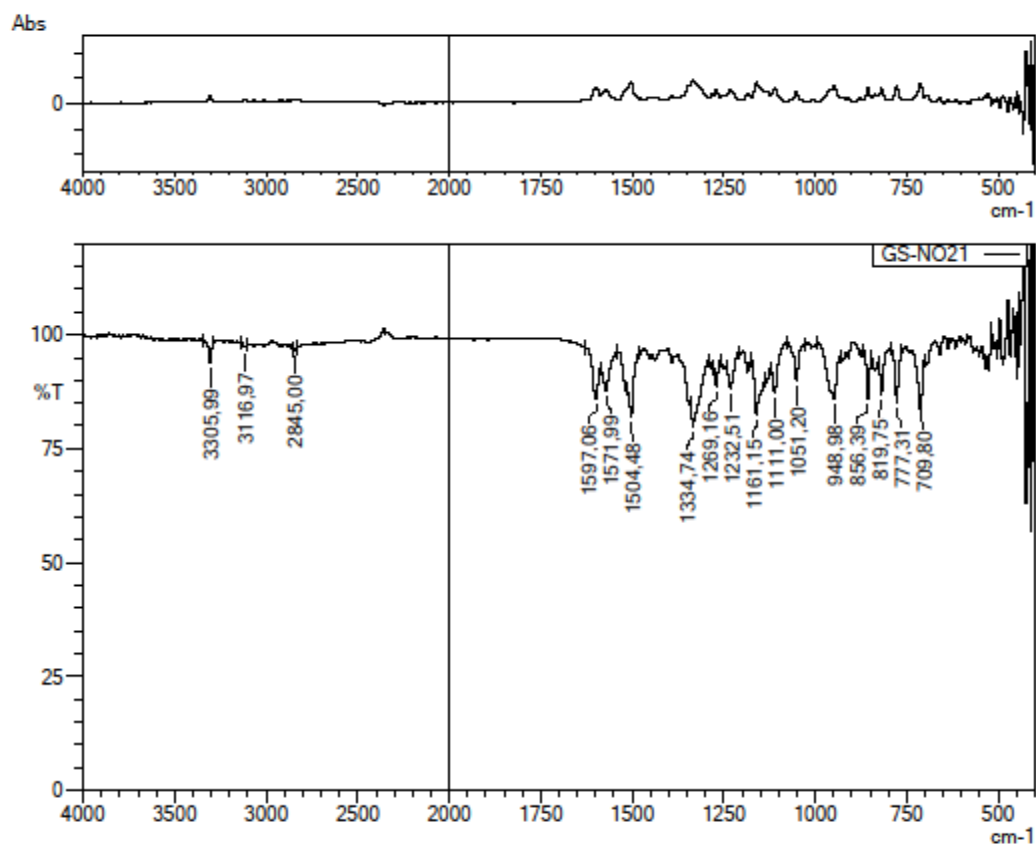

Figure S17. IR spectra of compound 3e.

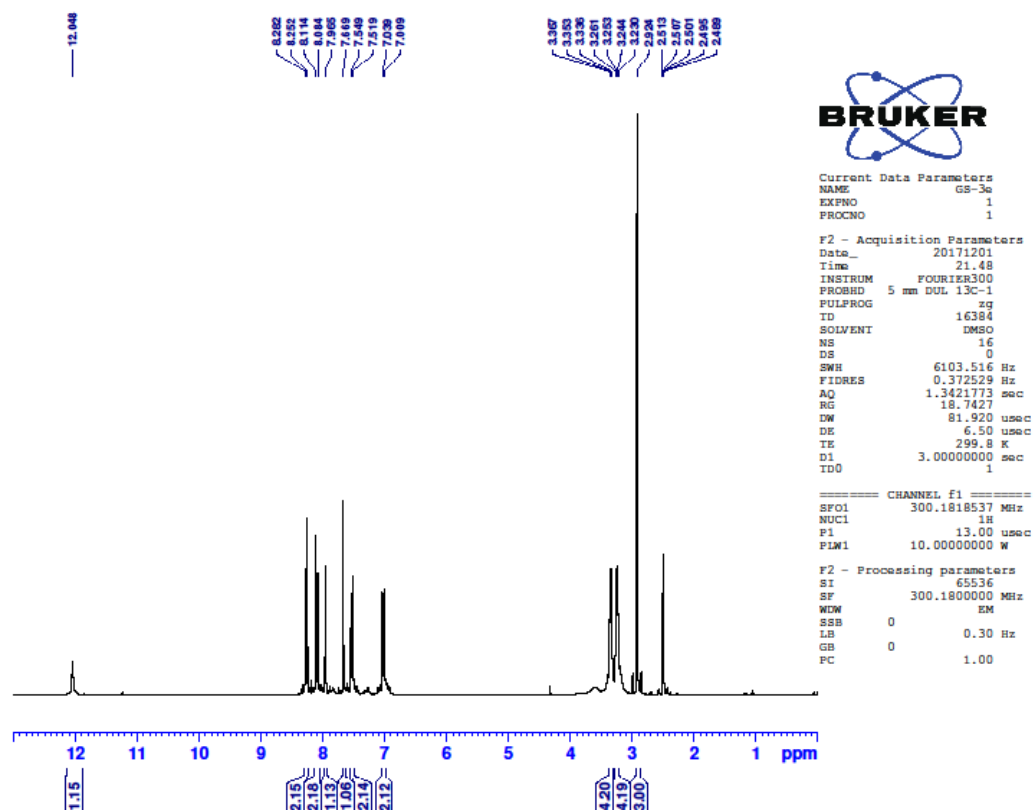

Figure S18. <sup>1</sup>H-NMR spectra of compound 3e.

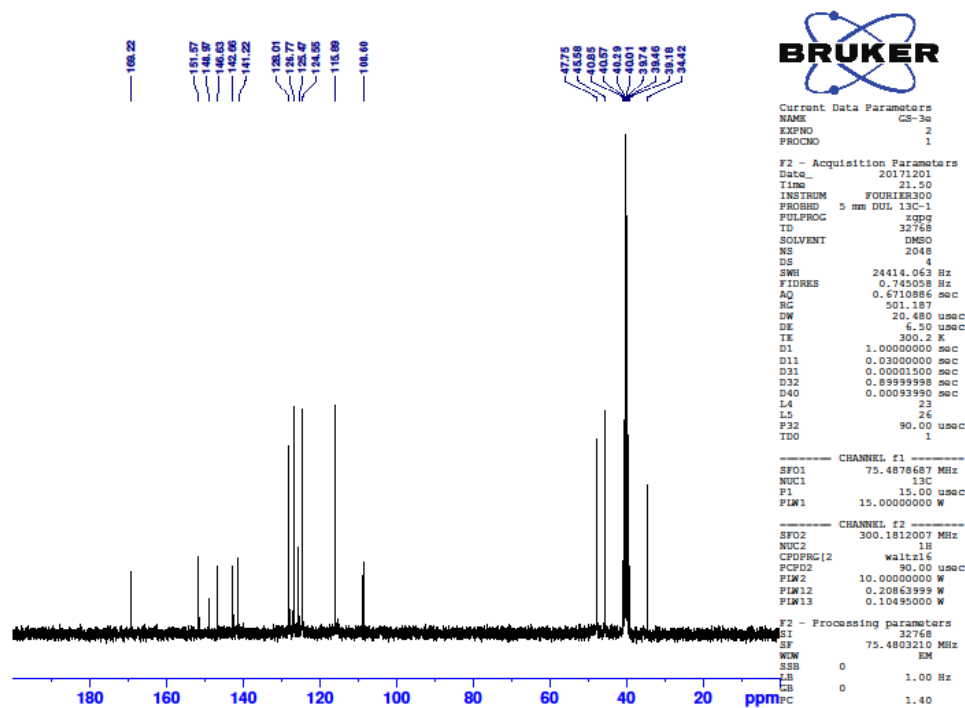

Figure S19. <sup>13</sup>C-NMR spectra of compound 3e.

## ==== Shimadzu LCMSsolution Analysis Report ====

Acquired by : Admin  
Sample Name : GS-NO2  
Sample ID :  
Vial # : 2  
Injection Volume : 0.3 uL  
Data File Name : GS-NO2\_16.lcd  
Method File Name : genel.lcm  
Batch File Name : batch.lcb  
Report File Name : DefaultLCMS.lcr  
Data Acquired : 19.04.2018 12:17:55  
Data Processed : 19.04.2018 12:28:59

## &lt;Chromatogram&gt;

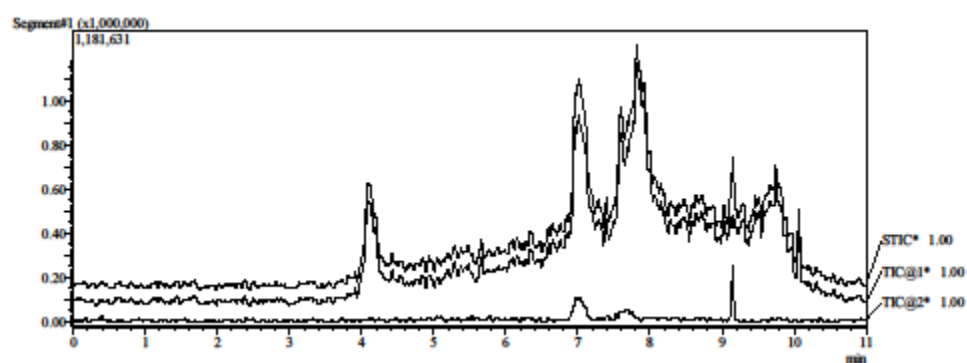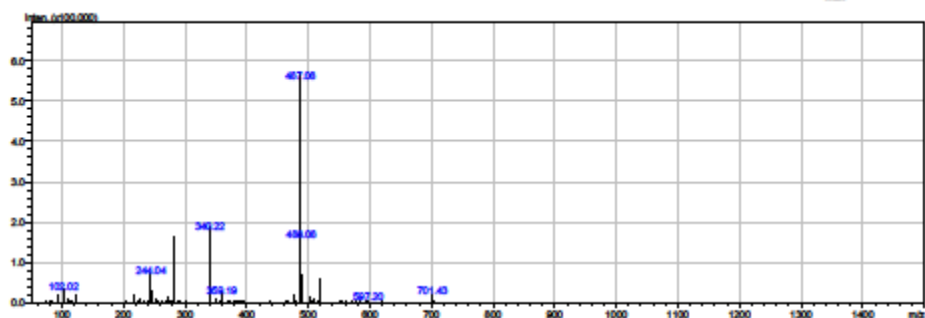

C:\LabSolutions\Data\Analiz\derya\GS-NO2\_16.lcd

Figure S20. LCMSMS spectra of compound 3e.

## DOPNALAB

| Item               | Value                                                        |
|--------------------|--------------------------------------------------------------|
| Acquired Date&Time | 13.04.2018 15:16:03                                          |
| Acquired by        | System Administrator                                         |
| Filename           | C:\Users\dopnalab\Desktop\deniz\ahmet osman tokay\GS-F1.lspd |
| Spectrum name      | GS-F1                                                        |
| Sample name        | GS-F                                                         |
| Sample ID          |                                                              |
| Option             |                                                              |
| Comment            |                                                              |
| No. of Scans       | 10                                                           |
| Resolution         | 4 [cm-1]                                                     |
| Apodization        | Happ-Genzel                                                  |

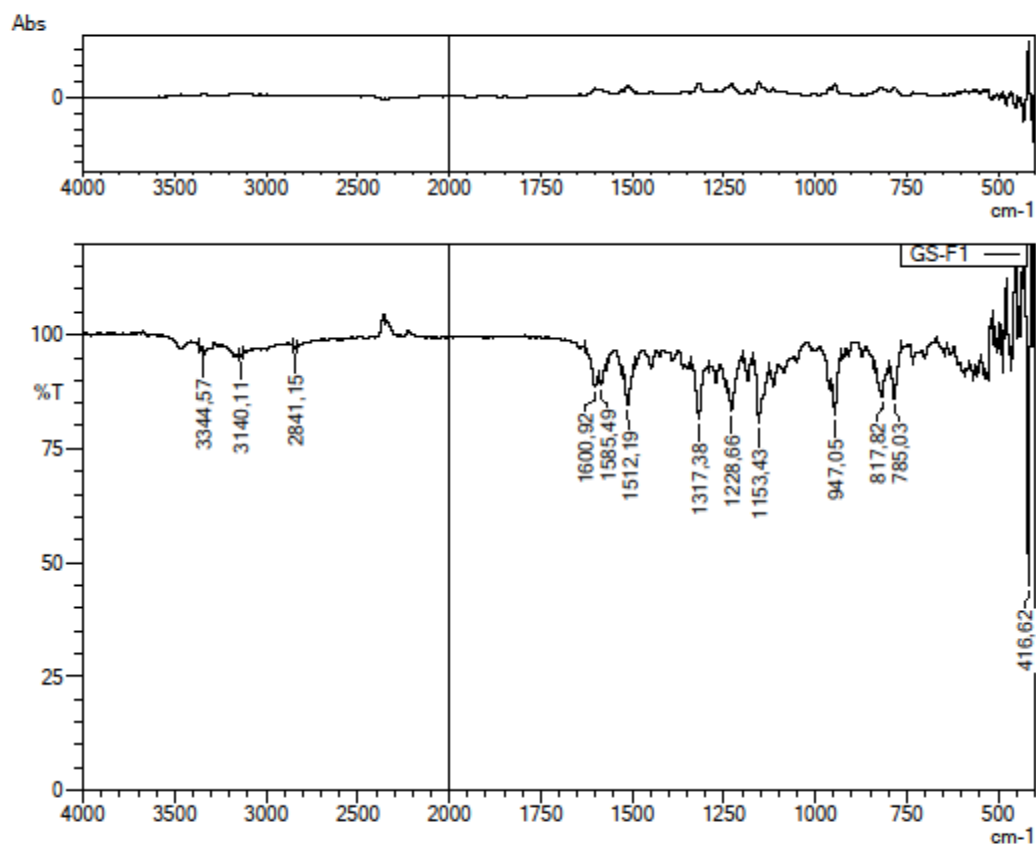

Figure S21. IR spectra of compound 3f.

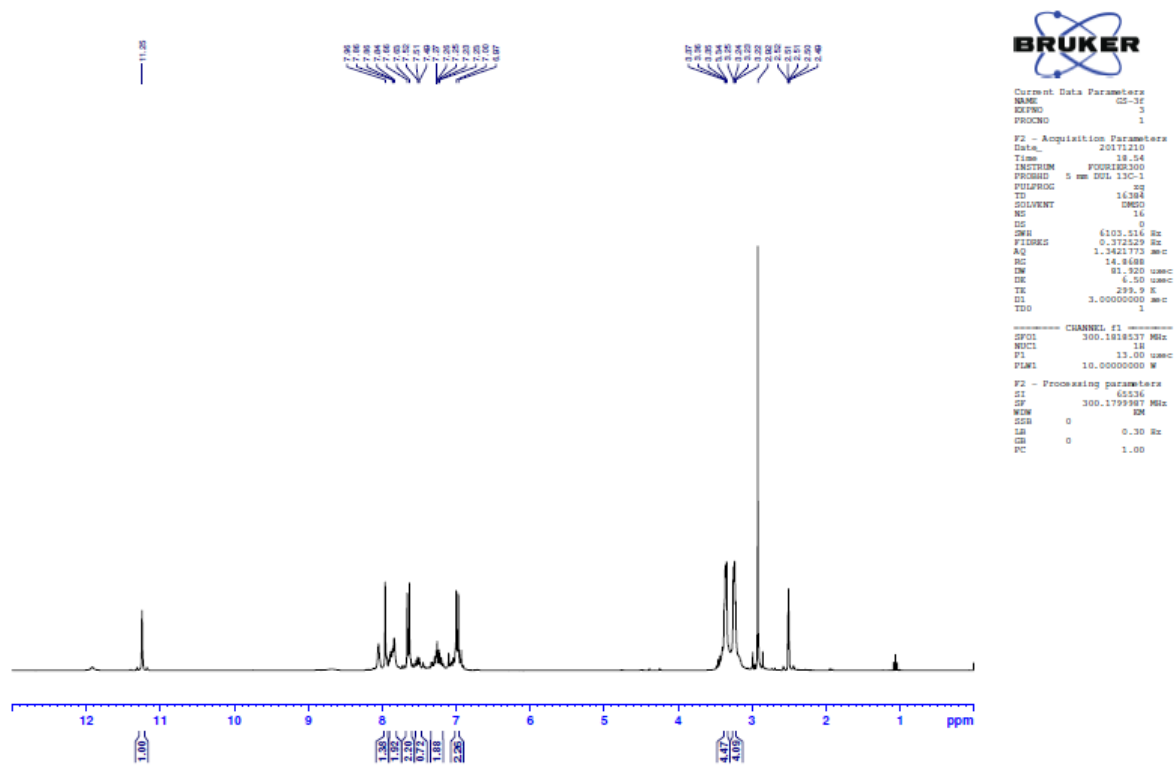

Figure S22. <sup>1</sup>H-NMR spectra of compound 3f.

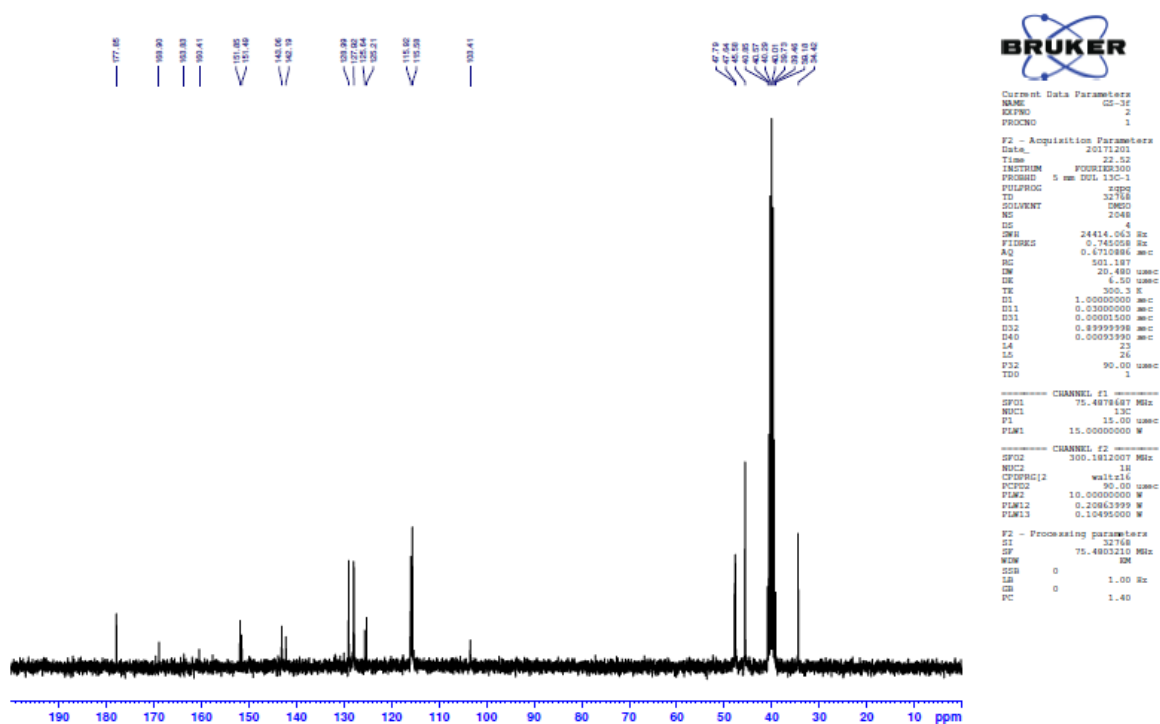

Figure S23. <sup>13</sup>C-NMR spectra of compound 3f.

## ==== Shimadzu LCMSsolution Analysis Report ====

Acquired by :Admin  
Sample Name :GS-F  
Sample ID :  
Vial # :15  
Injection Volume :0.3 µL  
Data File Name :GS-F\_22.lcd  
Method File Name :genel.lcm  
Batch File Name :batch.lcb  
Report File Name :DefaultLCMS.lcr  
Data Acquired :27.04.2021 10:35:10  
Data Processed :27.04.2021 10:46:14

## &lt;Chromatogram&gt;

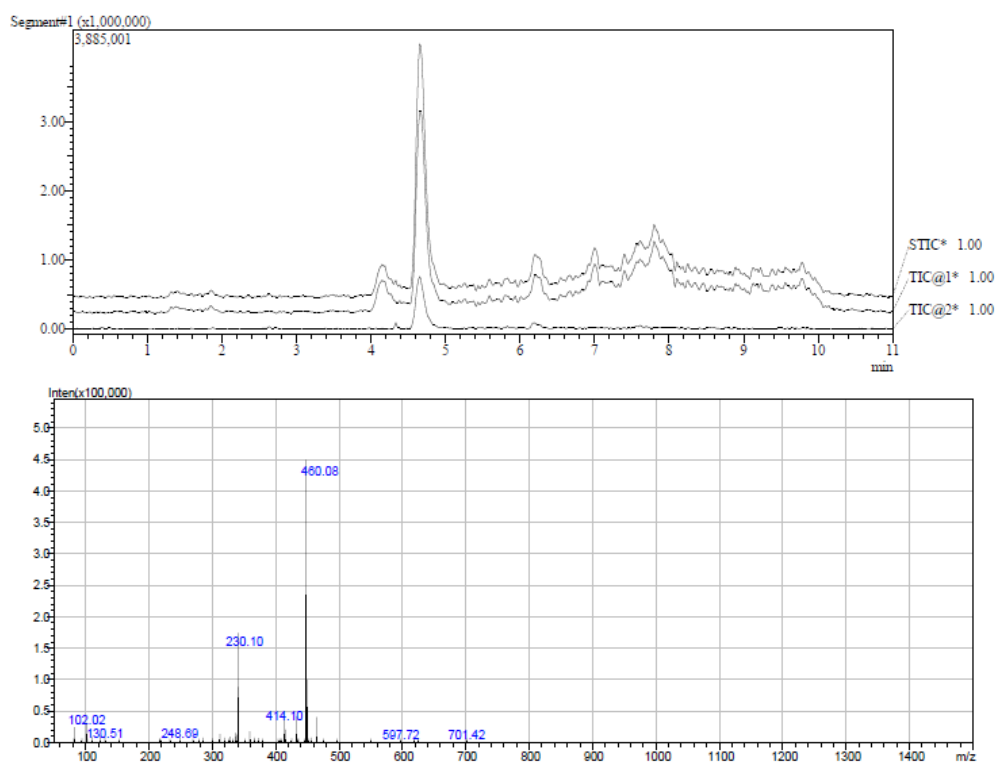

C:\LabSolutions\Data\Analiz\derya\GS-F\_22.lcd

Figure S24. LCMSMS spectra of compound 3f.

## DOPNALAB

| Item               | Value                                                         |
|--------------------|---------------------------------------------------------------|
| Acquired Date&Time | 13.04.2018 15:16:29                                           |
| Acquired by        | System Administrator                                          |
| Filename           | C:\Users\dopnalab\Desktop\denyalahmet osman tokay\GS-CI1.jspd |
| Spectrum name      | GS-CI1                                                        |
| Sample name        | GS-CI                                                         |
| Sample ID          |                                                               |
| Option             |                                                               |
| Comment            |                                                               |
| No. of Scans       | 10                                                            |
| Resolution         | 4 [cm-1]                                                      |
| Apodization        | Happ-Genzel                                                   |

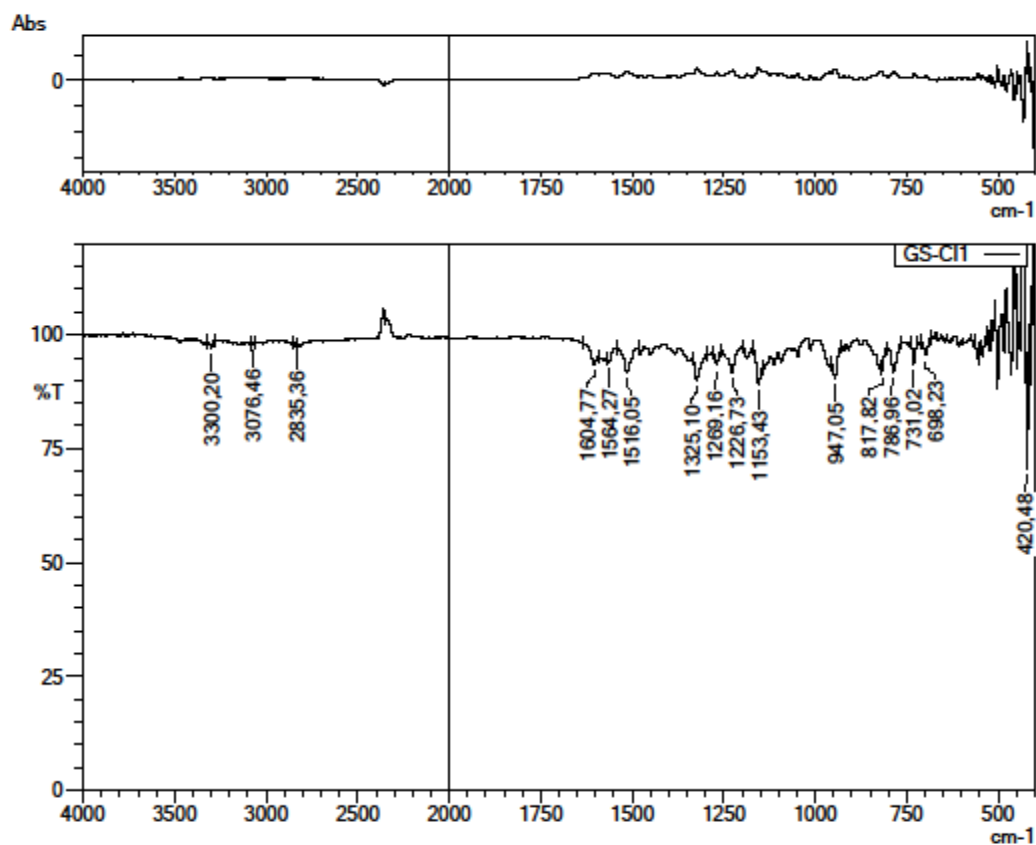

Figure S25. IR spectra of compound 3g.

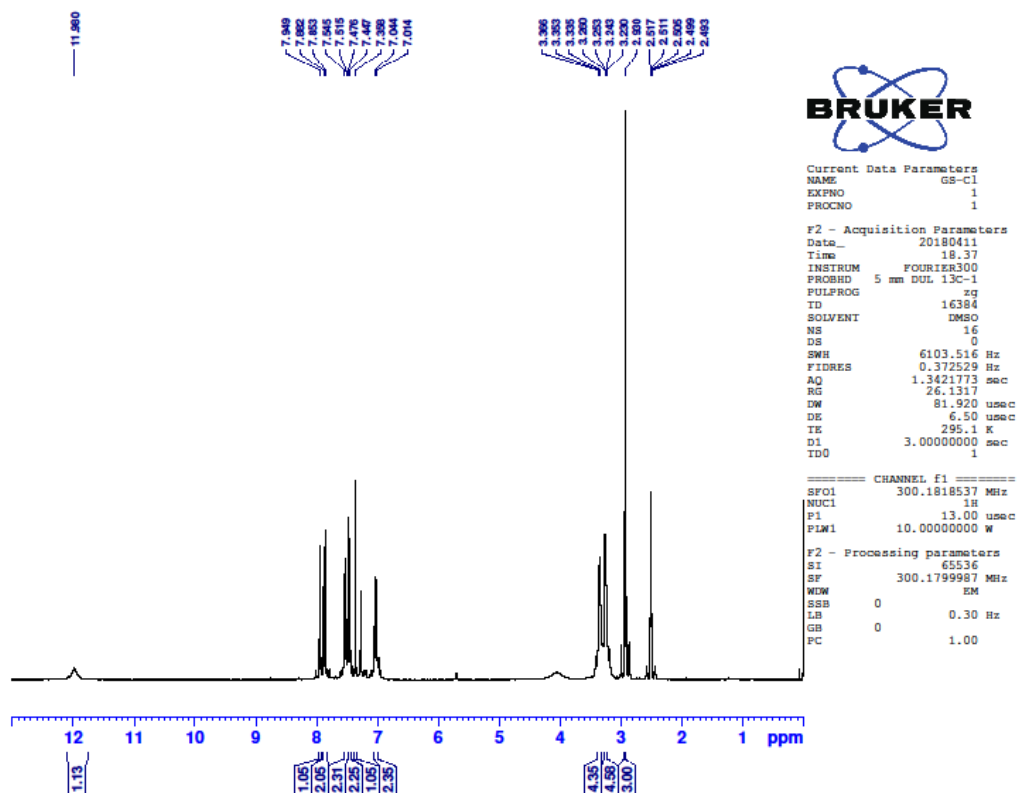

Figure S26.  $^1\text{H}$ -NMR spectra of compound 3g.

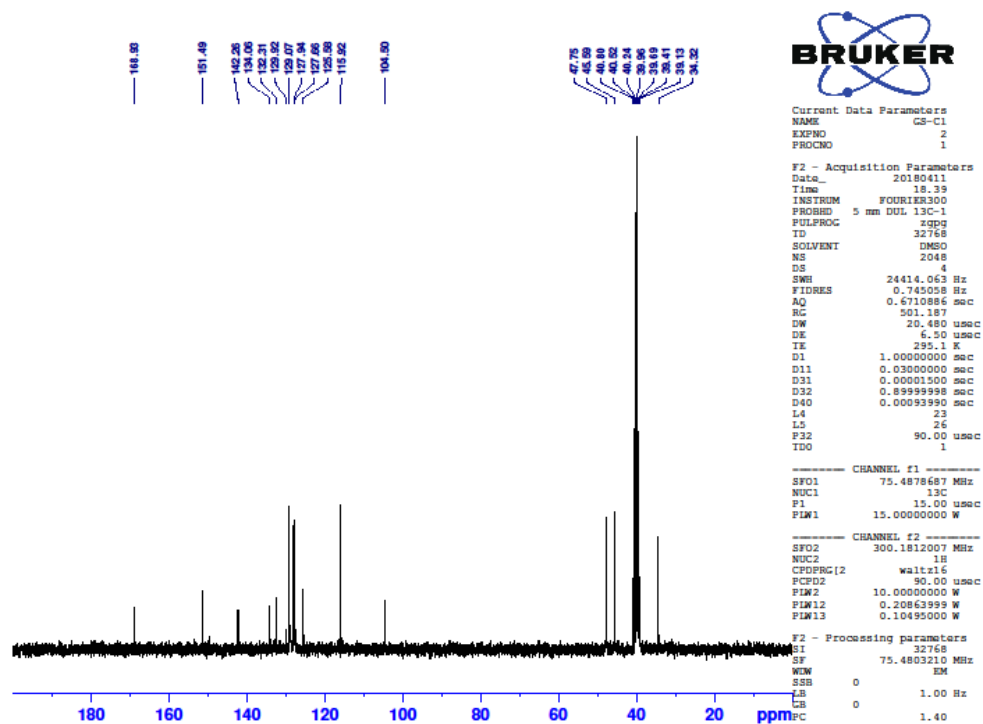

Figure S27.  $^{13}\text{C}$ -NMR spectra of compound 3g.



## ==== Shimadzu LCMSsolution Analysis Report ====

Acquired by : Admin  
Sample Name : GS-Cl  
Sample ID :  
Vial # : 4  
Injection Volume : 0.3 uL  
Data File Name : GS-Cl\_18.lcd  
Method File Name : genel.lcm  
Batch File Name : batch.job  
Report File Name : DefaultLCMS.lcr  
Data Acquired : 19.04.2018 12:41:02  
Data Processed : 19.04.2018 12:52:05

## &lt;Chromatogram&gt;

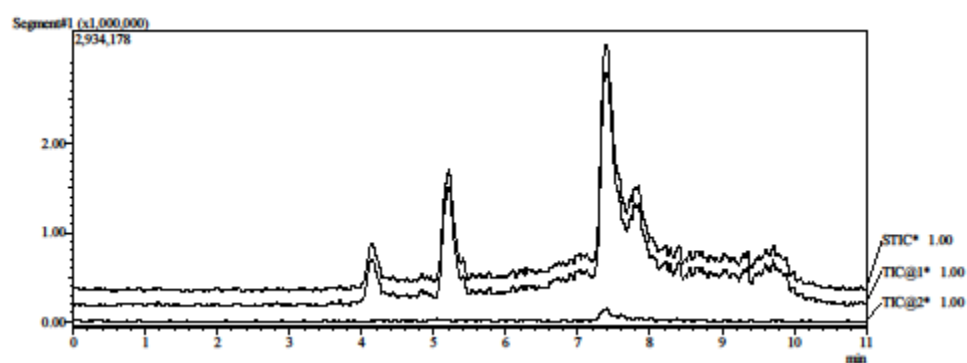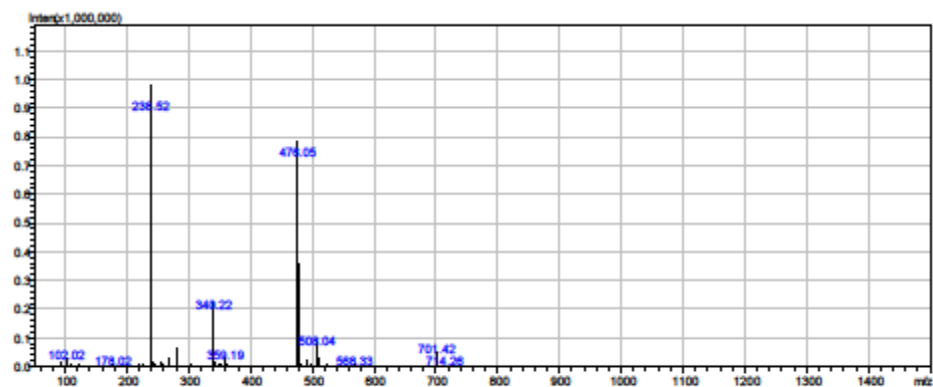

C:\LabSolutions\Data\Analiz\derya\GS-Cl\_18.lcd

Figure S28. LCMSMS spectra of compound 3g.

## DOPNALAB

| Item               | Value                                                          |
|--------------------|----------------------------------------------------------------|
| Acquired Date&Time | 13.04.2018 15:21:58                                            |
| Acquired by        | System Administrator                                           |
| Filename           | C:\Users\dopnalab\Desktop\denyalahmet osman tokay\GS-CF31.lspd |
| Spectrum name      | GS-CF31                                                        |
| Sample name        | GS-CF3                                                         |
| Sample ID          |                                                                |
| Option             |                                                                |
| Comment            |                                                                |
| No. of Scans       | 10                                                             |
| Resolution         | 4 [cm-1]                                                       |
| Apodization        | Happ-Genzel                                                    |

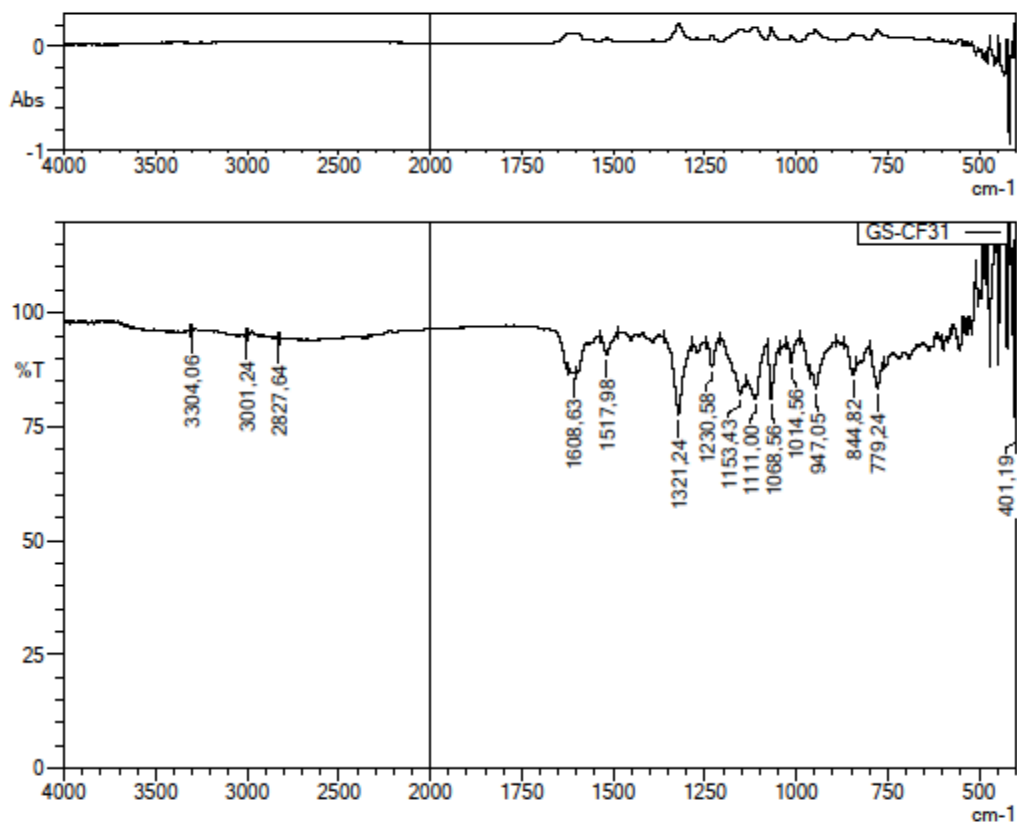

Figure S29. IR spectra of compound 3h.

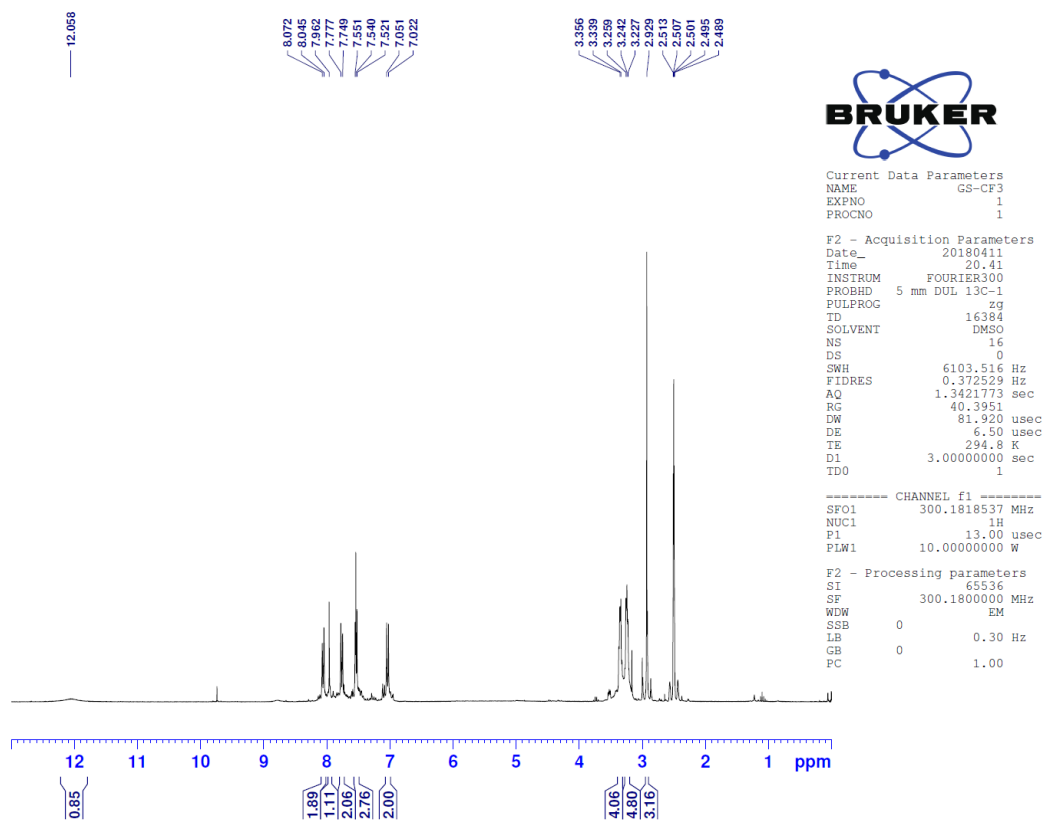

Figure S30. <sup>1</sup>H-NMR spectra of compound 3h.

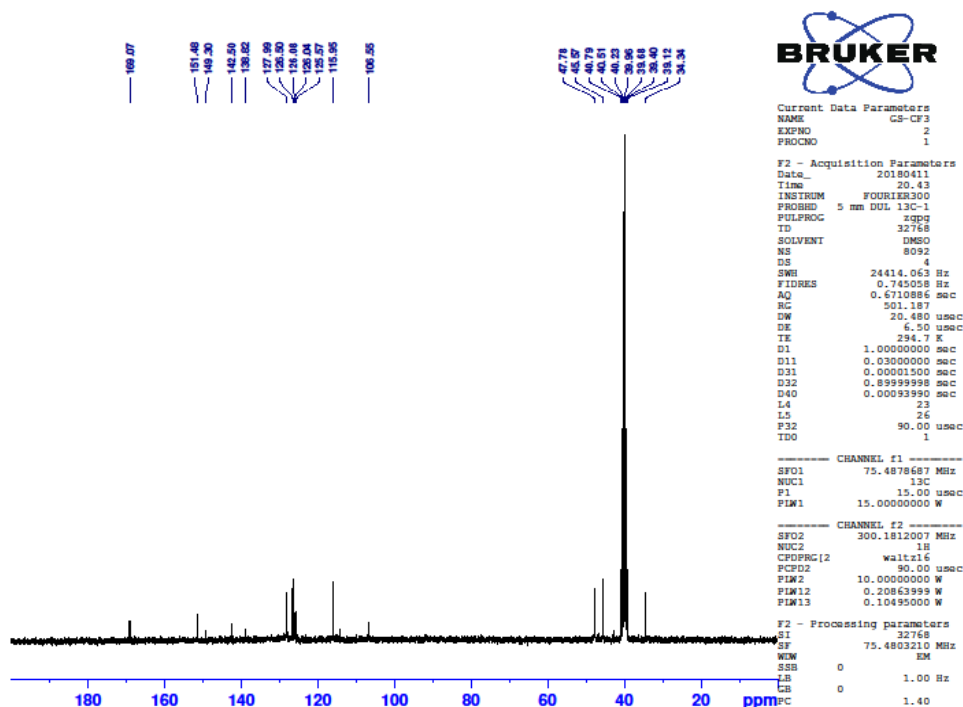

Figure S31. <sup>13</sup>C-NMR spectra of compound 3h.

## ==== Shimadzu LCMSsolution Analysis Report ====

Acquired by : Admin  
Sample Name : GS-CF3  
Sample ID :  
Vial # : 3  
Injection Volume : 0.3 uL  
Data File Name : GS-CF3\_17.lcd  
Method File Name : genel.lcm  
Batch File Name : batch.lcb  
Report File Name : DefaultLCMS.lcr  
Data Acquired : 19.04.2018 12:29:29  
Data Processed : 19.04.2018 12:40:32

## &lt;Chromatogram&gt;

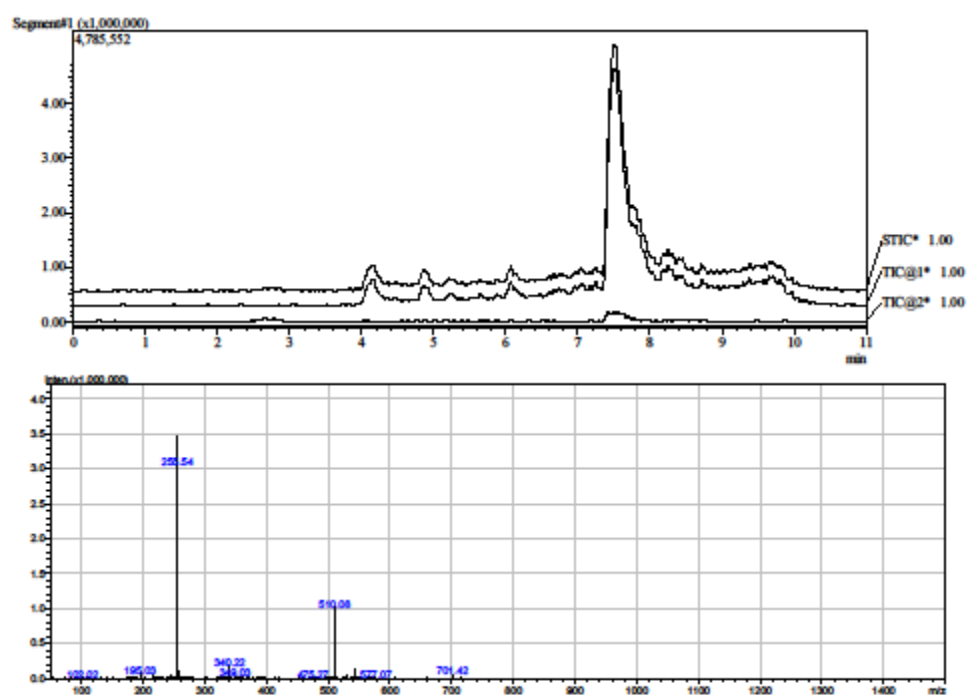

C:\LabSolutions\Data\Analiz\deryal\GS-CF3\_17.lcd

Figure S32. LCMSMS spectra of compound 3h.

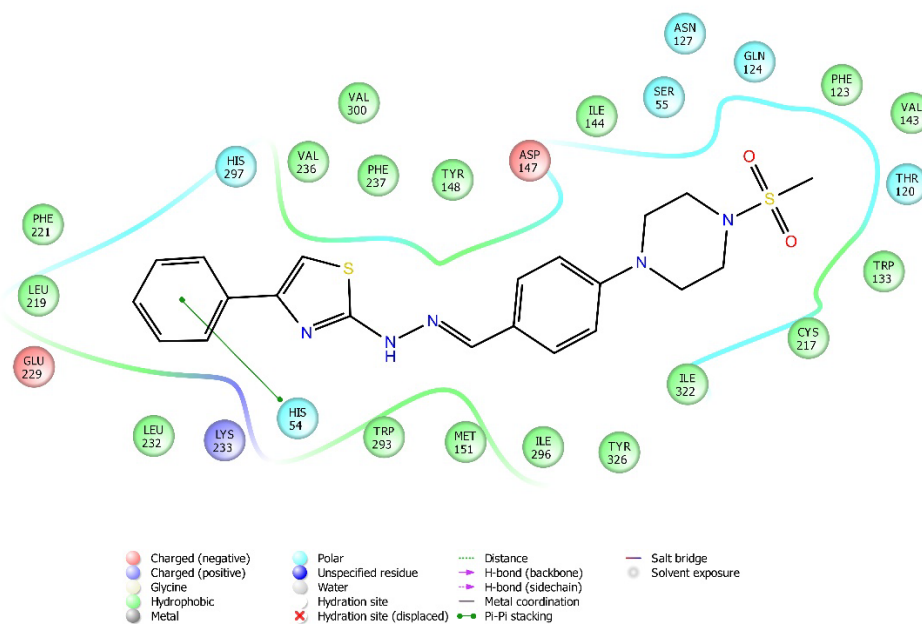

**Figure S33.** The two-dimensional interacting mode of compound 3a in the active region of  $\mu$ -opioid receptor (PDB Code: 5C1M).

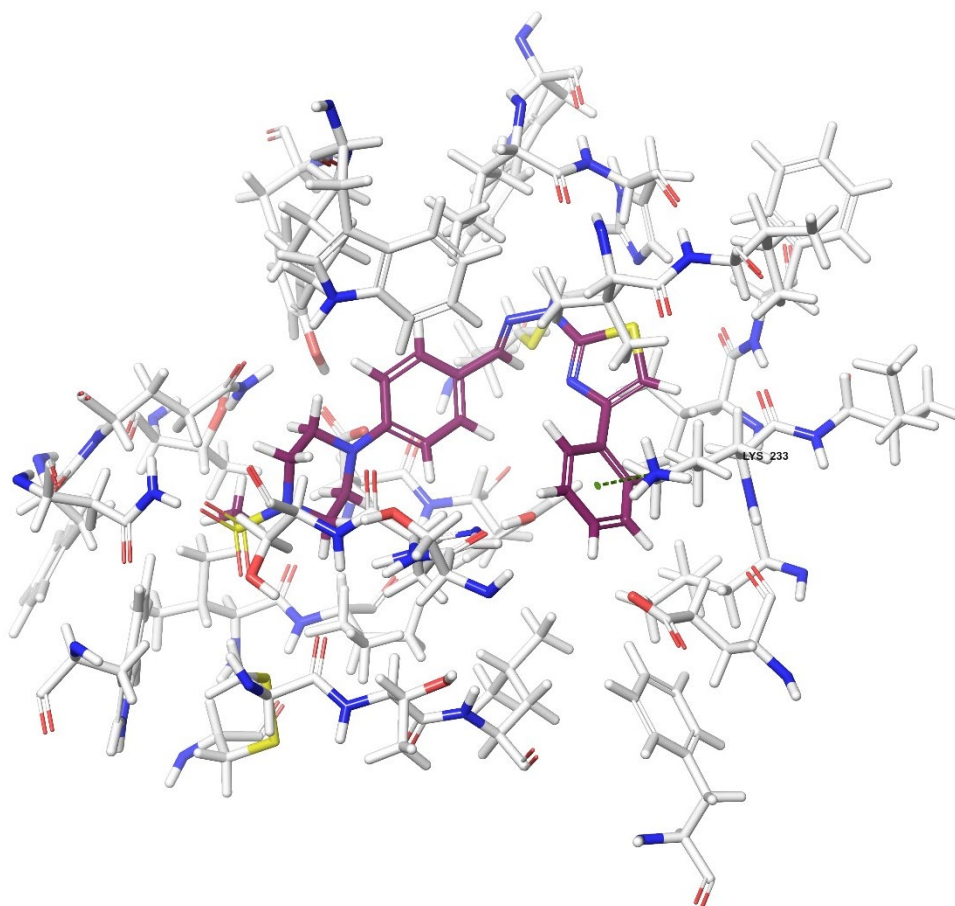

**Figure S34.** The three-dimensional interacting mode of compound 3a in the active region of  $\mu$ -opioid receptor. The ligand and significant residues of the active site of the receptor are presented by a tube model colored with purple and white, respectively (PDB Code: 5C1M).

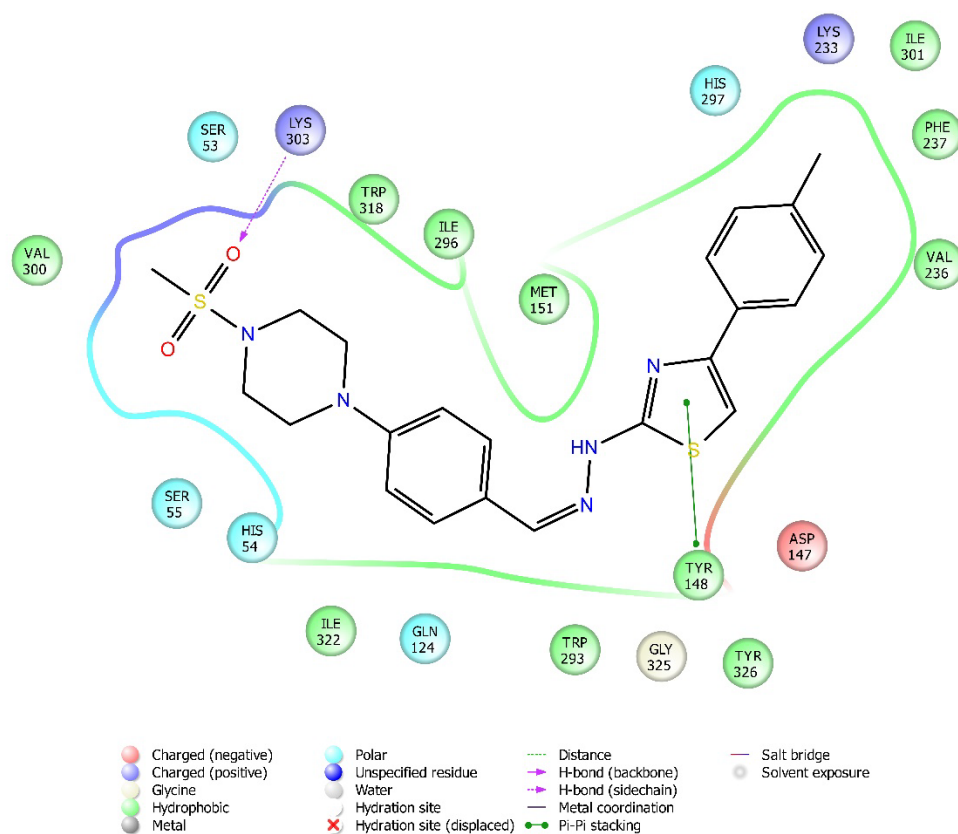

**Figure S35.** The two-dimensional interacting mode of compound **3b** in the active region of  $\mu$ -opioid receptor (PDB Code: 5C1M).

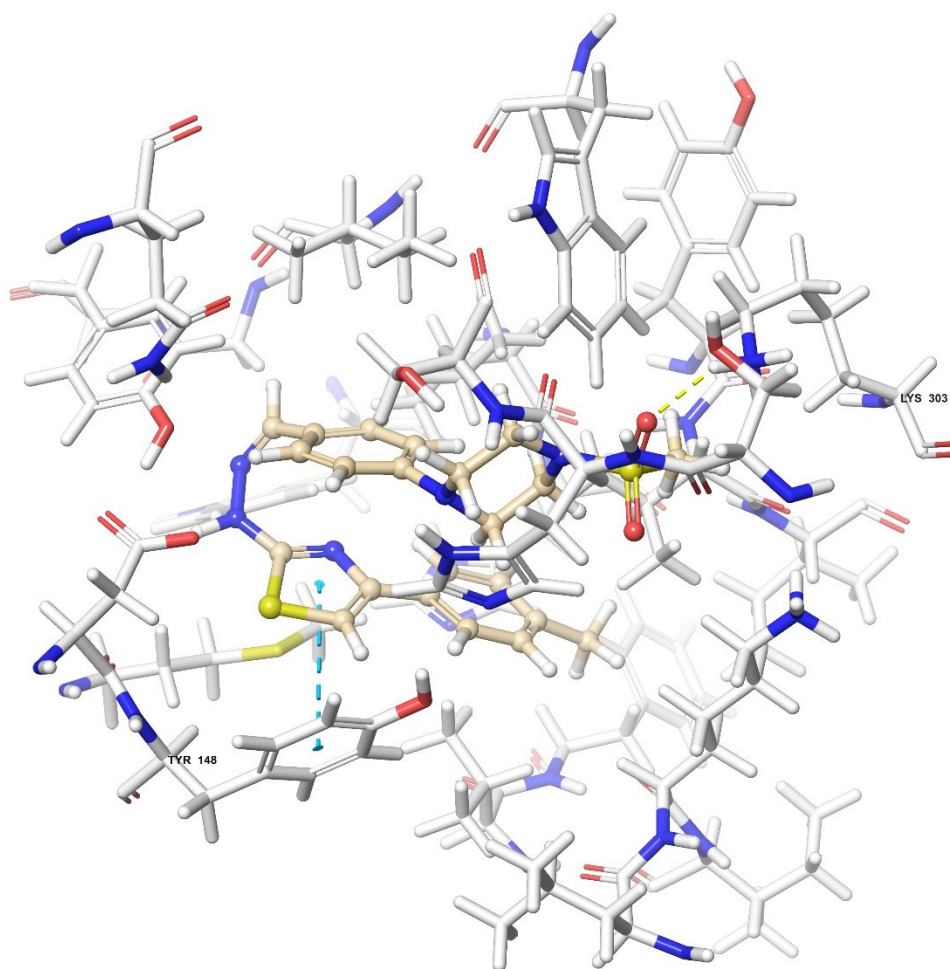

**Figure S36.** The three-dimensional interacting mode of compound **3b** in the active region of  $\mu$ -opioid receptor. The ligand and significant residues of the active site of the receptor are presented by a tube model colored with orange and white, respectively (PDB Code: 5C1M).

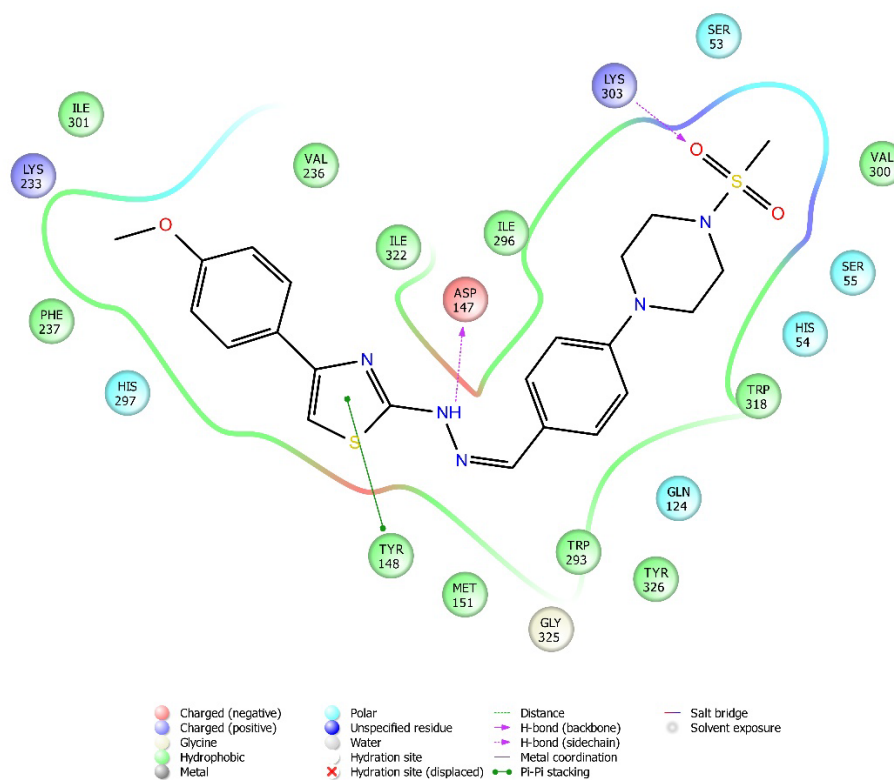

**Figure S37.** The two-dimensional interacting mode of compound **3c** in the active region of  $\mu$ -opioid receptor (PDB Code: 5C1M).



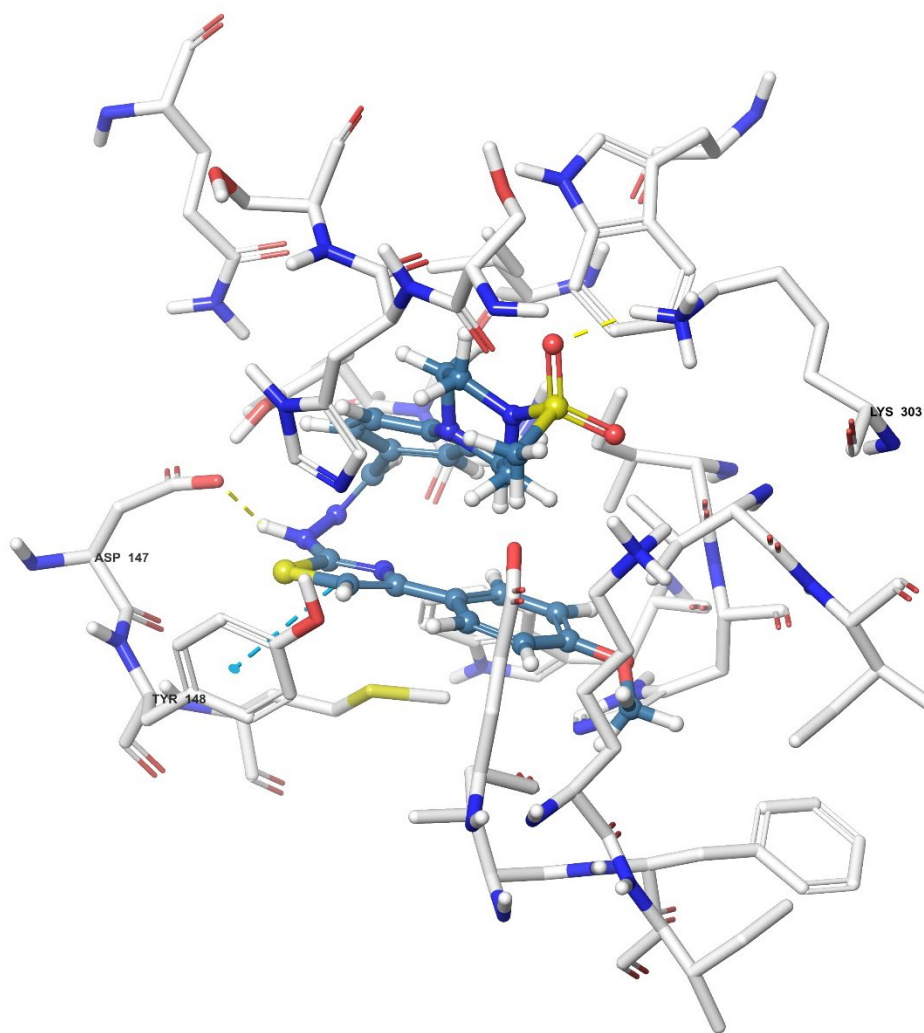

**Figure S38.** The three-dimensional interacting mode of compound **3c** in the active region of  $\mu$ -opioid receptor. The ligand and significant residues of the active site of the receptor are presented by a tube model colored with blue and white, respectively (PDB Code: 5C1M).

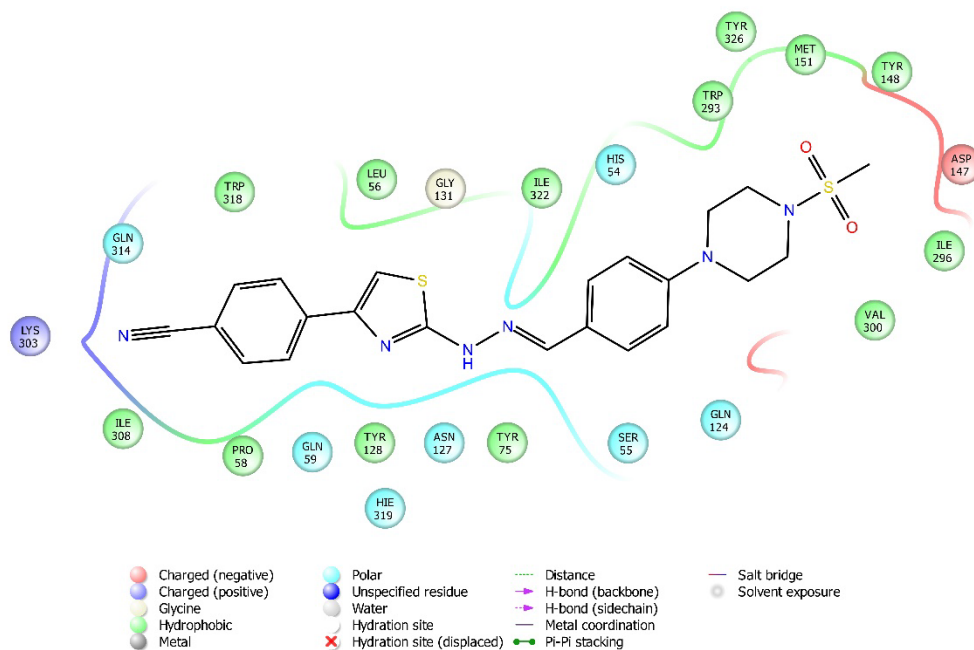

**Figure S39.** The two-dimensional interacting mode of compound **3d** in the active region of  $\mu$ -opioid receptor (PDB Code: 5C1M).

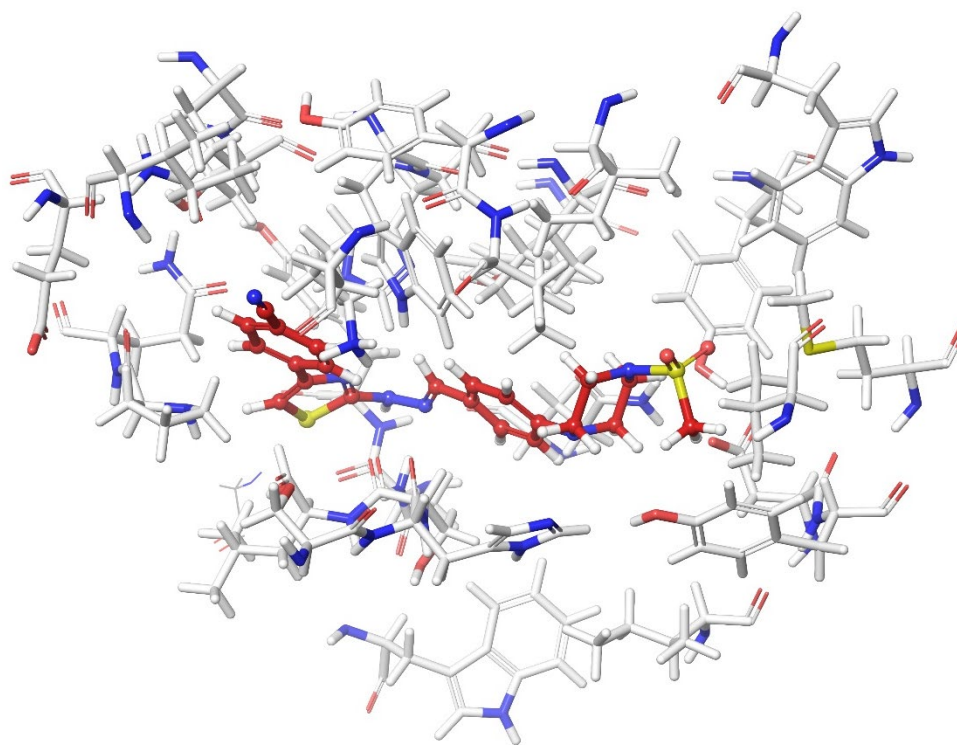

**Figure S40.** The three-dimensional interacting mode of compound **3d** in the active region of  $\mu$ -opioid receptor. The ligand and significant residues of the active site of the receptor are presented by a tube model colored with red and white, respectively (PDB Code: 5C1M).

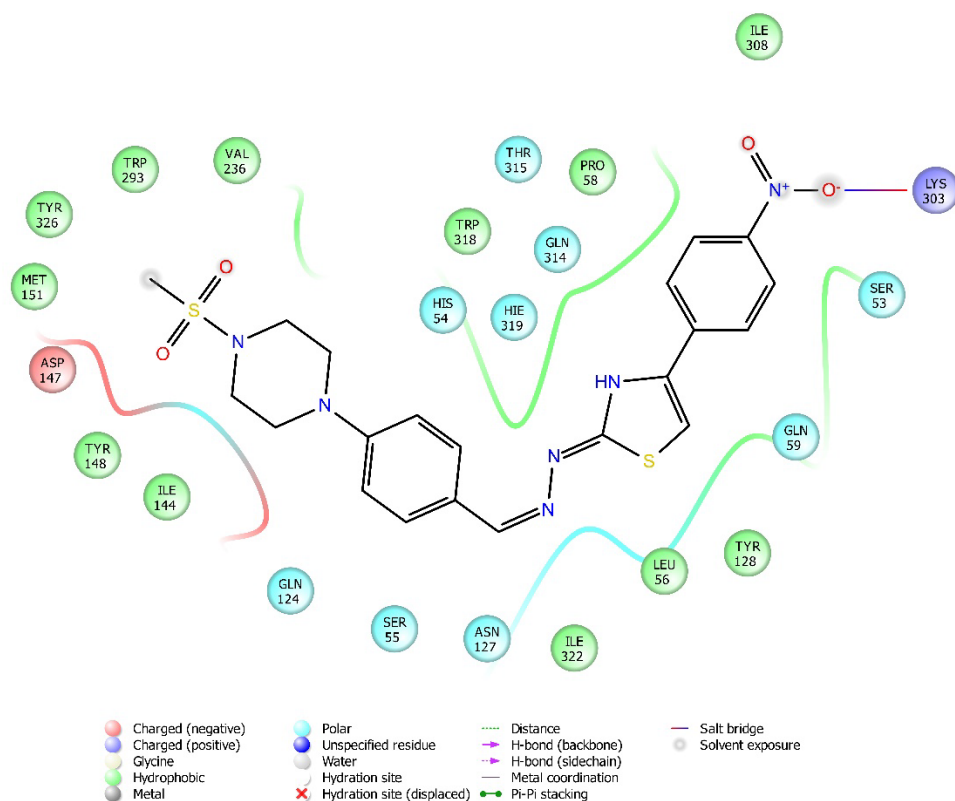

**Figure S41.** The two-dimensional interacting mode of compound **3e** in the active region of  $\mu$ -opioid receptor (PDB Code: 5C1M).

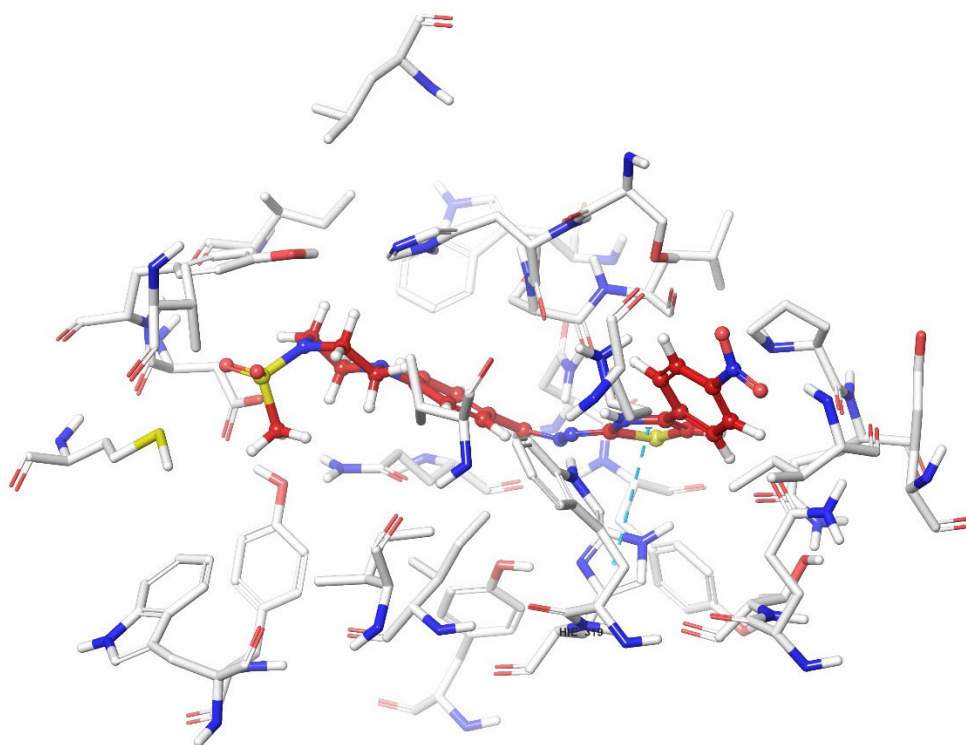

**Figure S42.** The three-dimensional interacting mode of compound **3e** in the active region of  $\mu$ -opioid receptor. The ligand and significant residues of the active site of the receptor are presented by a tube model colored with red and white, respectively (PDB Code: 5C1M).

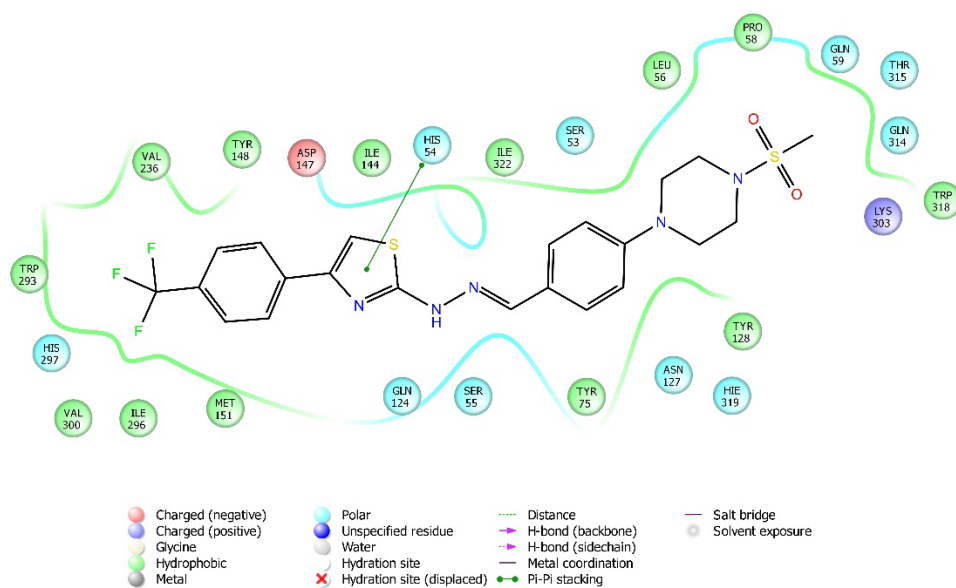

**Figure S43.** The two-dimensional interacting mode of compound **3h** in the active region of  $\mu$ -opioid receptor (PDB Code: 5C1M).

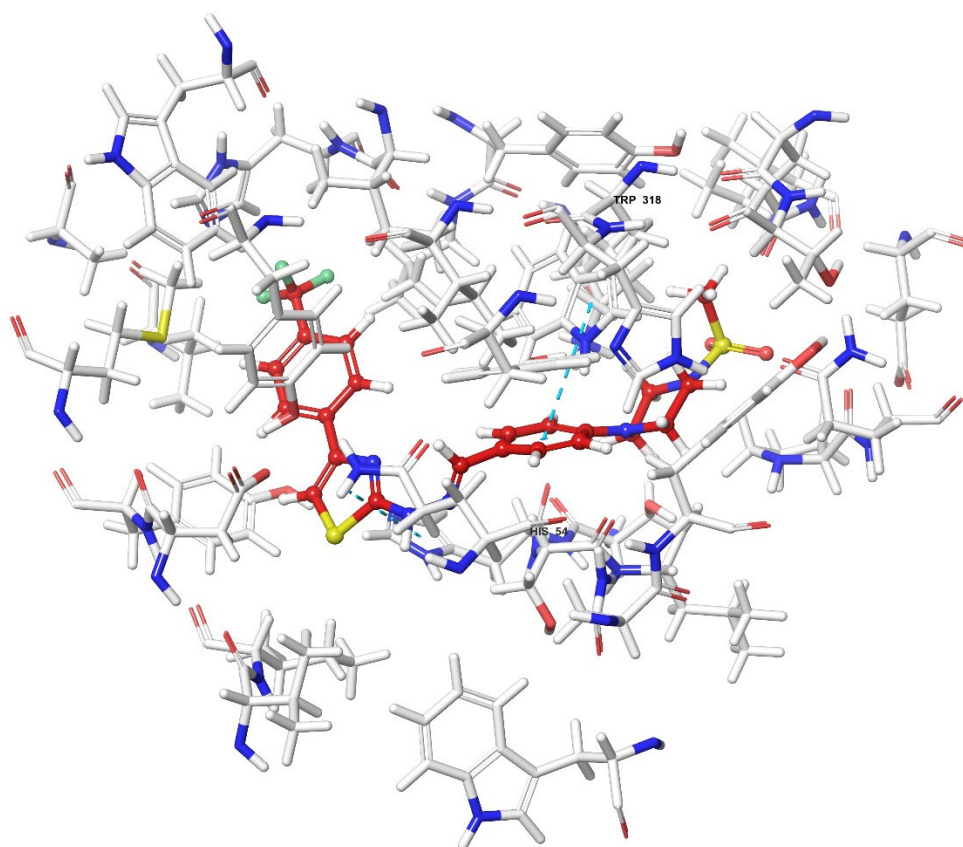

**Figure S44.** The three-dimensional interacting mode of compound **3h** in the active region of  $\mu$ -opioid receptor. The ligand and significant residues of the active site of the receptor are presented by a tube model colored with red and white, respectively (PDB Code: 5C1M).

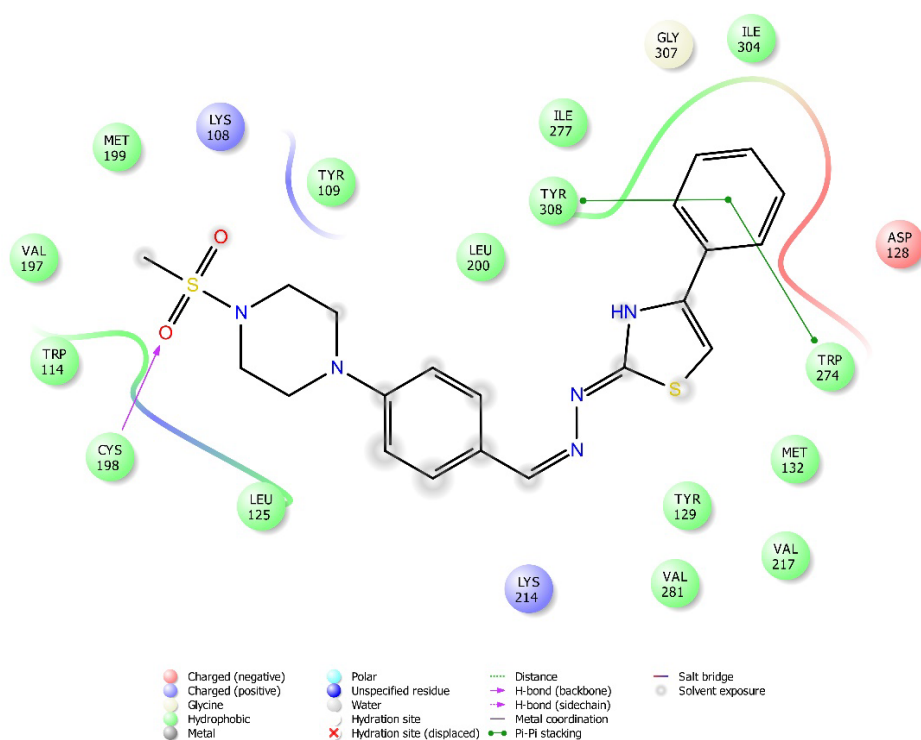

**Figure S45.** The two-dimensional interacting mode of compound **3a** in the active region of  $\delta$ -opioid receptor (PDB Code: 4N6H).

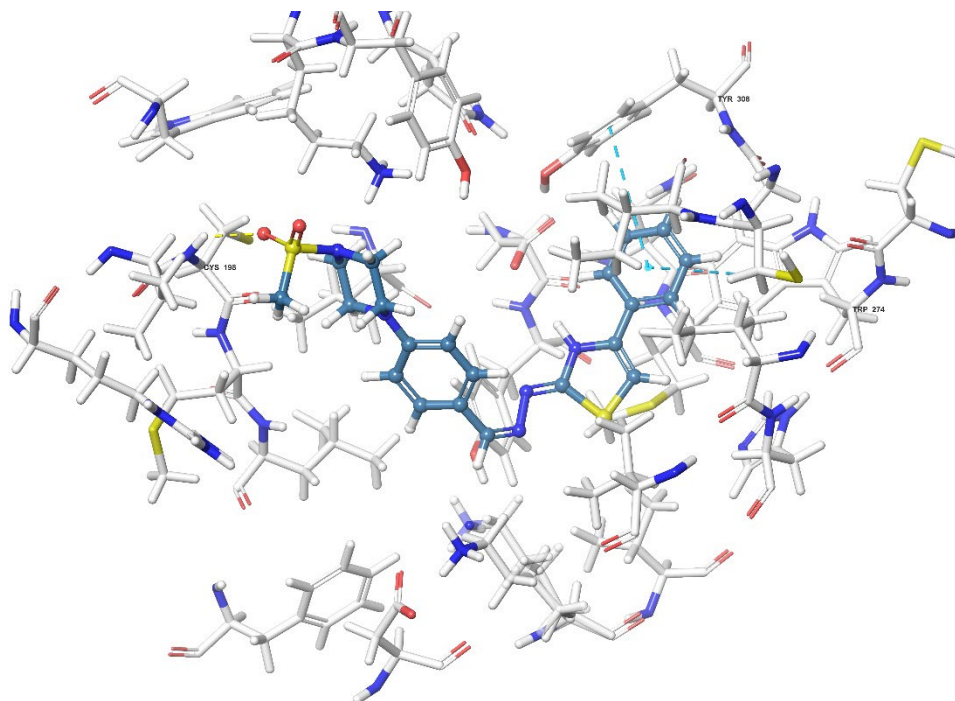

**Figure S46.** The three-dimensional interacting mode of compound **3a** in the active region of  $\delta$ -opioid receptor. The ligand and significant residues of the active site of the receptor are presented by a tube model colored with blue and white, respectively (PDB Code: 4N6H).



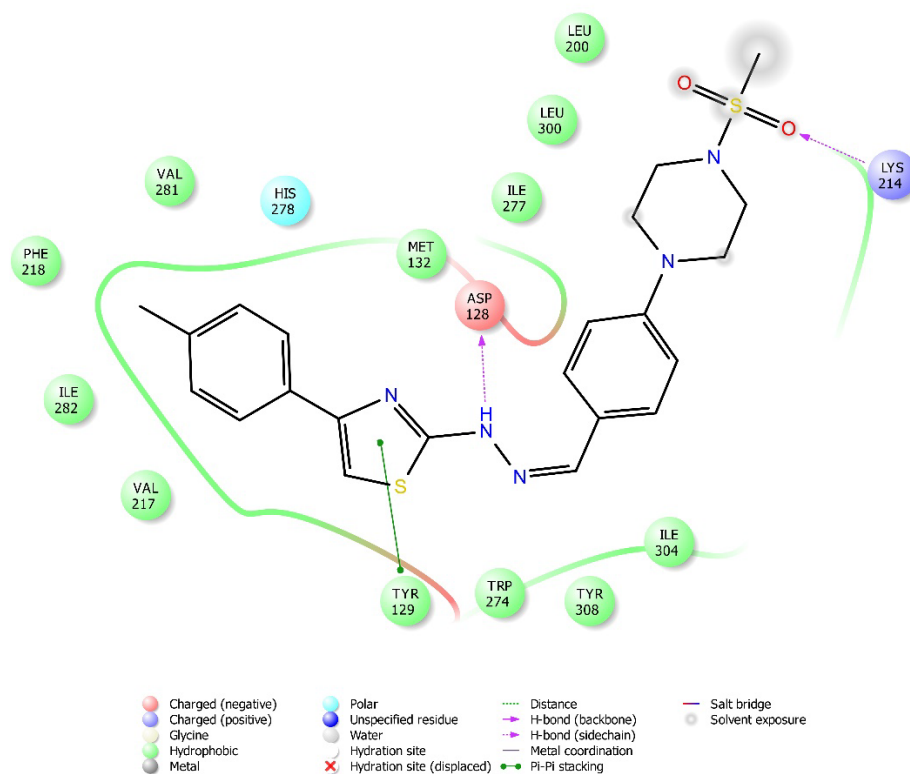

**Figure S47.** The two-dimensional interacting mode of compound **3b** in the active region of  $\delta$ -opioid receptor (PDB Code: 4N6H).

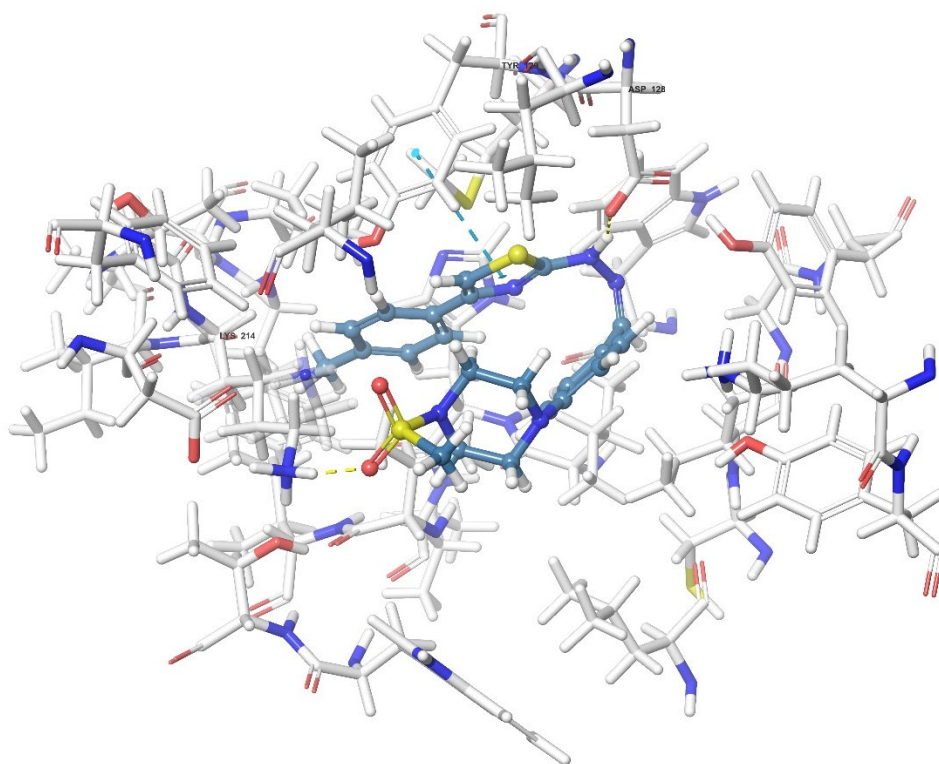

**Figure S48.** The three-dimensional interacting mode of compound **3b** in the active region of  $\delta$ -opioid receptor. The ligand and significant residues of the active site of the receptor are presented by a tube model colored with blue and white, respectively (PDB Code: 4N6H).

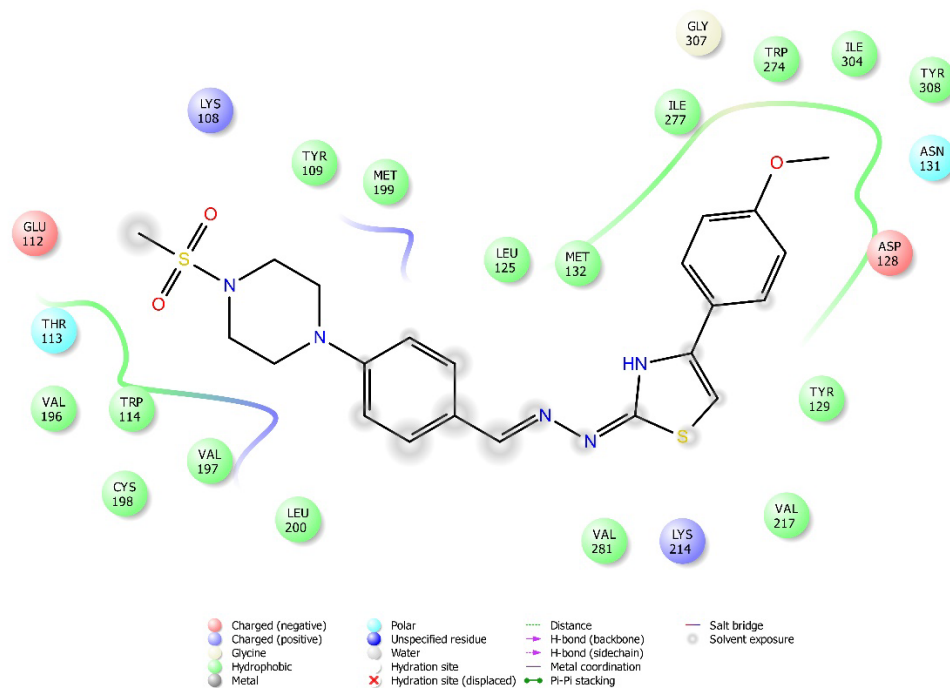

**Figure S49.** The two-dimensional interacting mode of compound **3c** in the active region of  $\delta$ -opioid receptor (PDB Code: 4N6H).

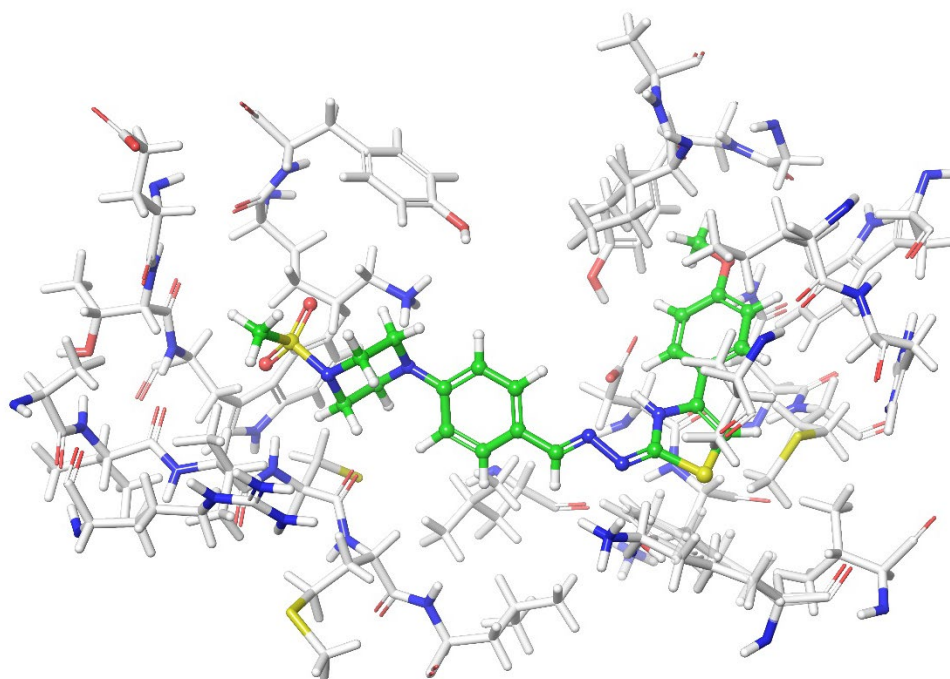

**Figure S50.** The three-dimensional interacting mode of compound **3c** in the active region of  $\delta$ -opioid receptor. The ligand and significant residues of the active site of the receptor are presented by a tube model colored with green and white, respectively (PDB Code: 4N6H).

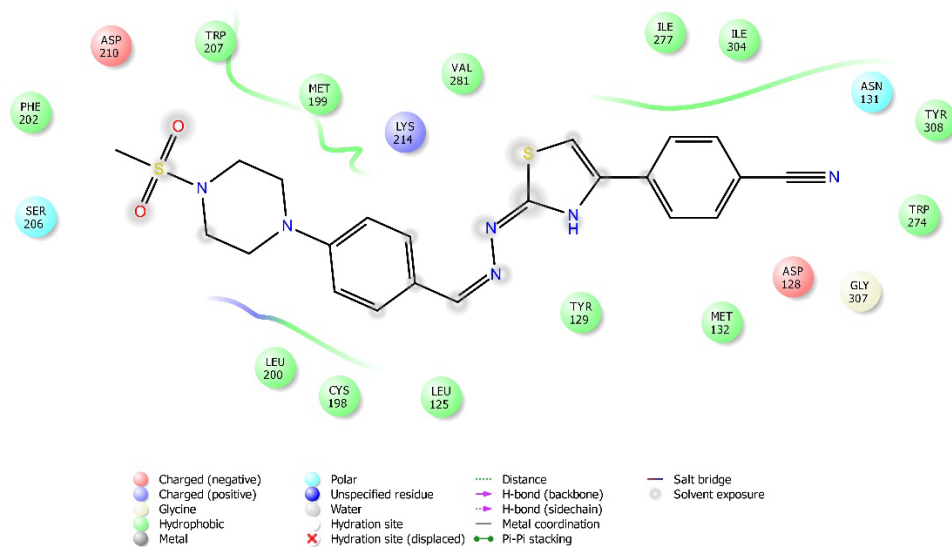

**Figure S51.** The two-dimensional interacting mode of compound **3d** in the active region of  $\delta$ -opioid receptor (PDB Code: 4N6H).

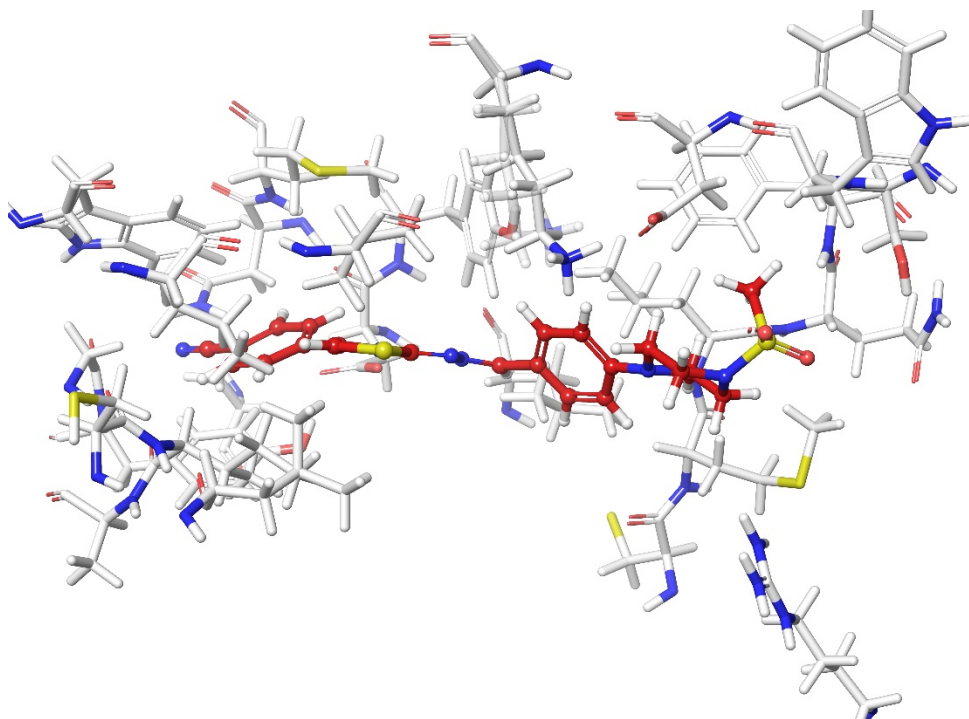

**Figure S52.** The three-dimensional interacting mode of compound **3d** in the active region of  $\delta$ -opioid receptor. The ligand and significant residues of the active site of the receptor are presented by a tube model colored with red and white, respectively (PDB Code: 4N6H).



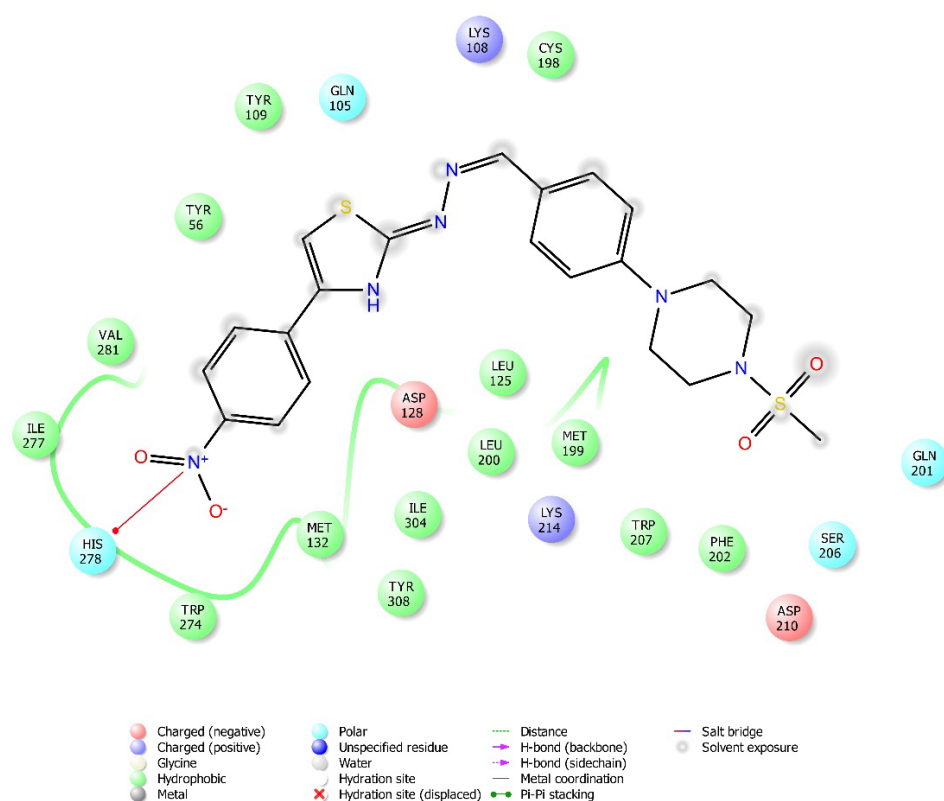

**Figure S53.** The two-dimensional interacting mode of compound **3e** in the active region of  $\delta$ -opioid receptor (PDB Code: 4N6H).

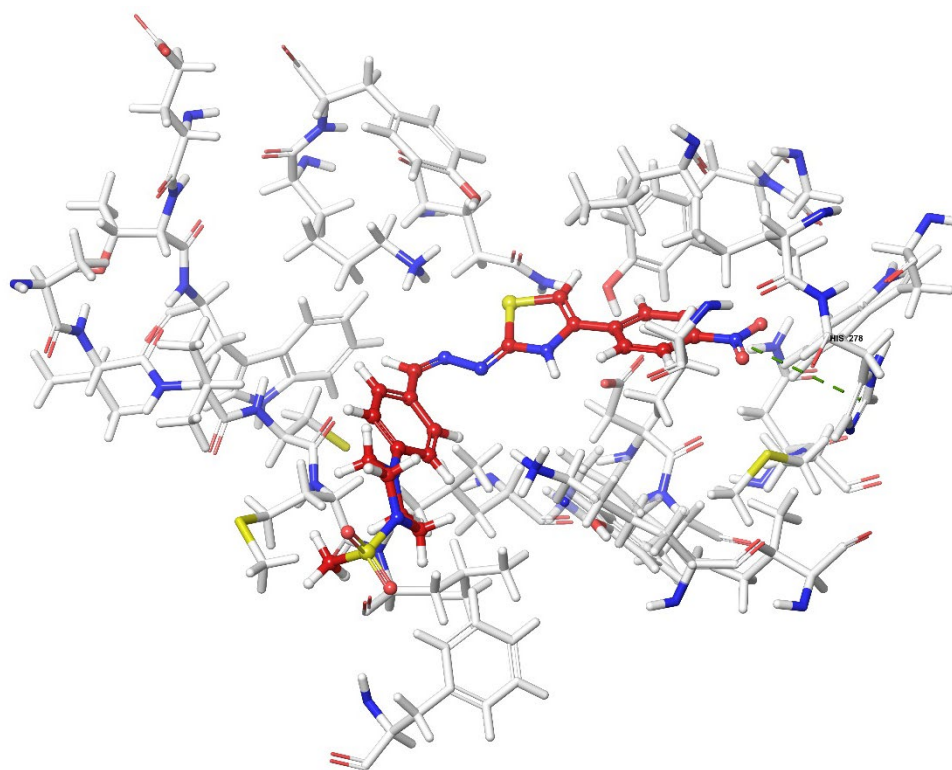

**Figure S54.** The three-dimensional interacting mode of compound **3e** in the active region of  $\delta$ -opioid receptor. The ligand and significant residues of the active site of the receptor are presented by a tube model colored with red and white, respectively (PDB Code: 4N6H).

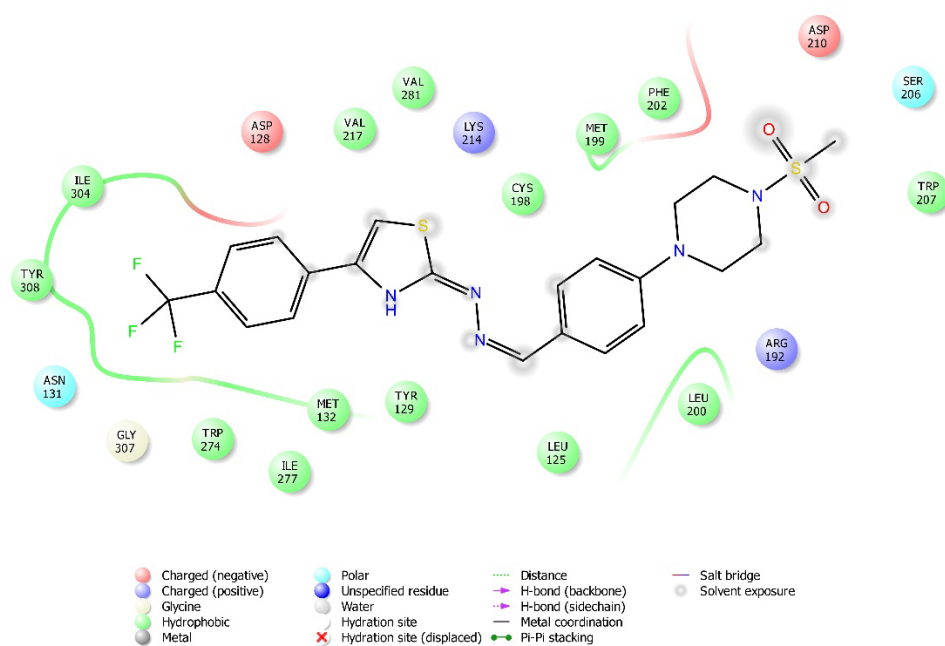

**Figure S55.** The two-dimensional interacting mode of compound **3h** in the active region of  $\delta$ -opioid receptor (PDB Code: 4N6H).

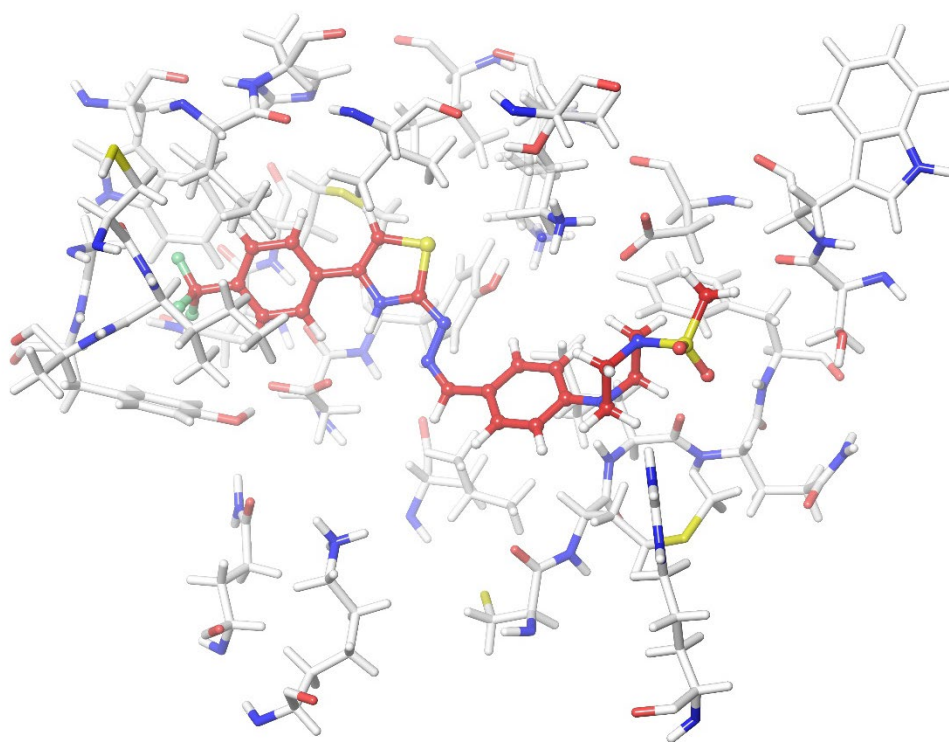

**Figure S56.** The three-dimensional interacting mode of compound **3h** in the active region of  $\delta$ -opioid receptor. The ligand and significant residues of the active site of the receptor are presented by a tube model colored with red and white, respectively (PDB Code: 4N6H).

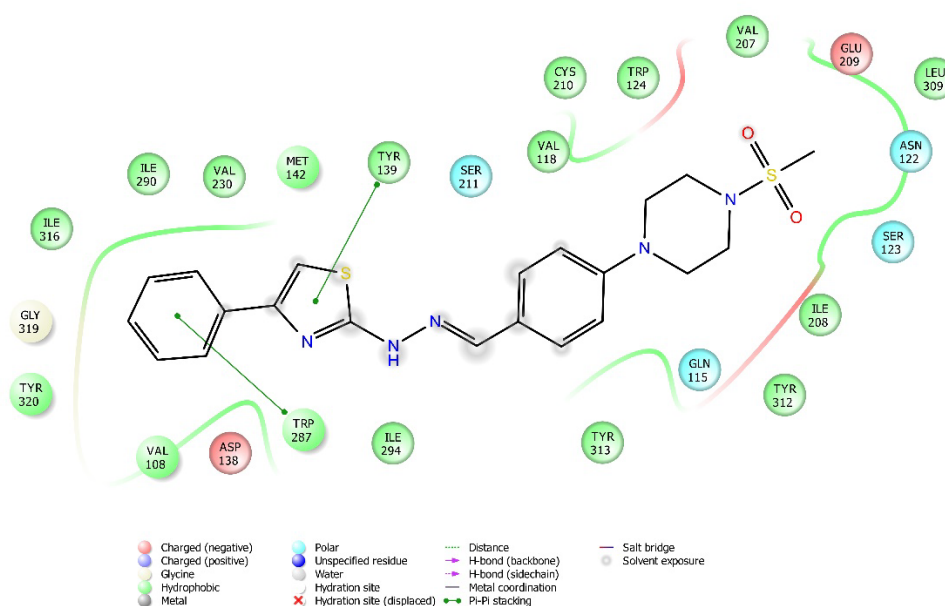

**Figure S57.** The two-dimensional interacting mode of compound **3a** in the active region of  $\kappa$ -opioid receptor (PDB Code: 6B73).

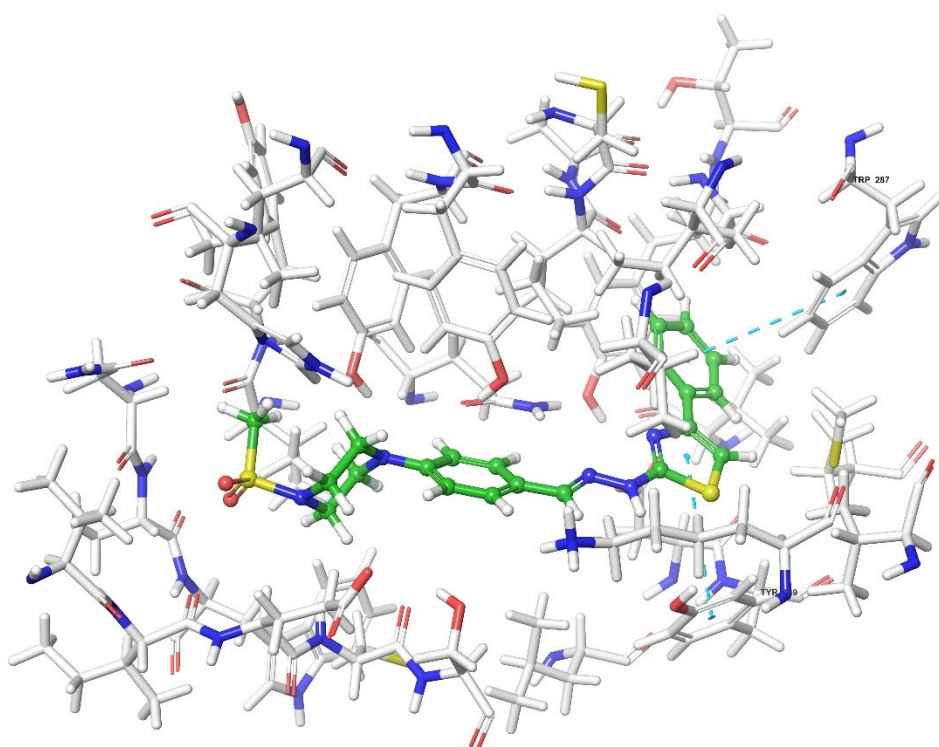

**Figure S58.** The three-dimensional interacting mode of compound **3a** in the active region of  $\kappa$ -opioid receptor. The ligand and significant residues of the active site of the receptor are presented by a tube model colored with green and white, respectively (PDB Code: 6B73).

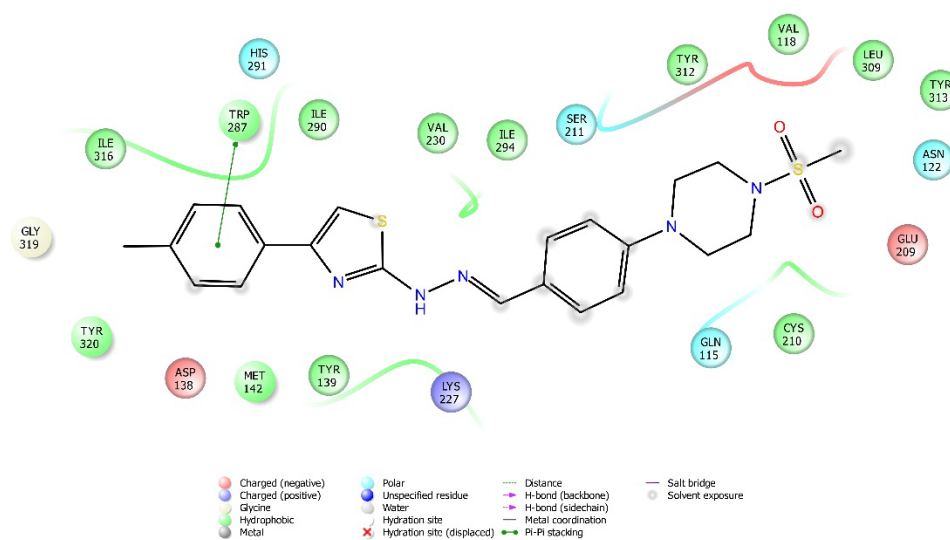

**Figure S59.** The two-dimensional interacting mode of compound **3b** in the active region of  $\kappa$ -opioid receptor (PDB Code: 6B73).

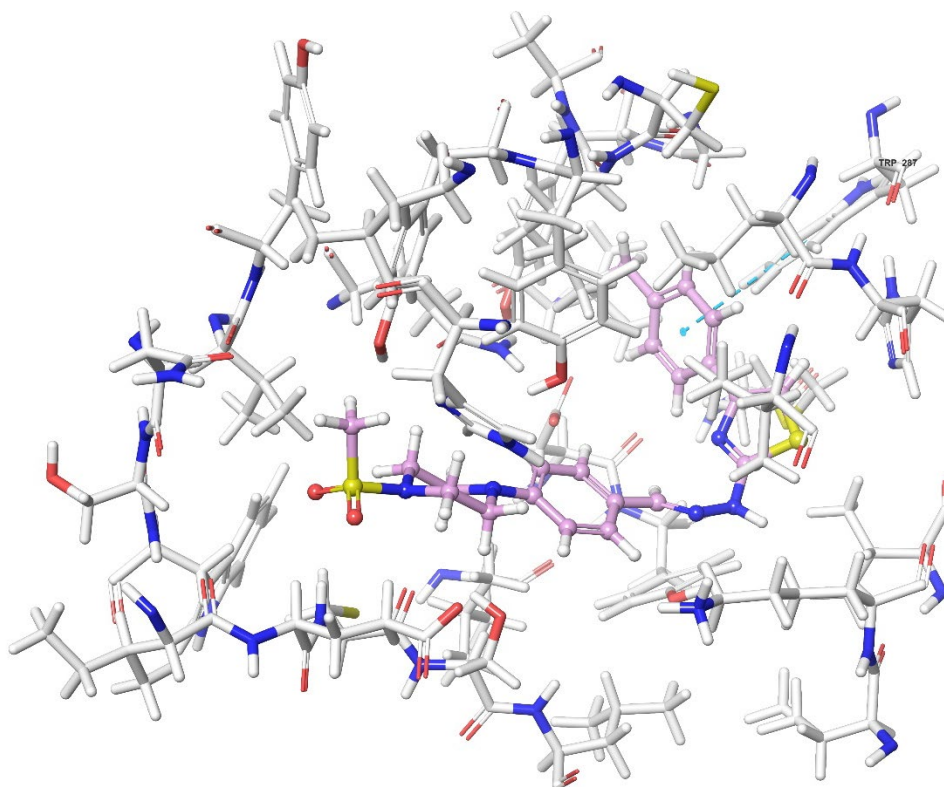

**Figure S60.** The three-dimensional interacting mode of compound **3b** in the active region of  $\kappa$ -opioid receptor. The ligand and significant residues of the active site of the receptor are presented by a tube model colored with pink and white, respectively (PDB Code: 6B73).



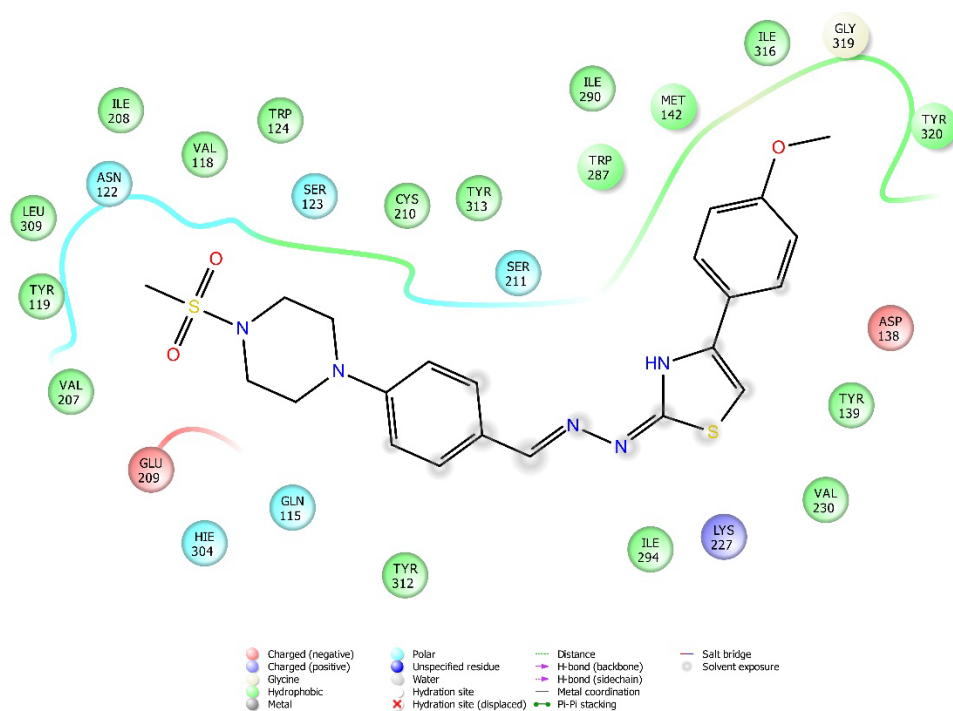

**Figure S61.** The two-dimensional interacting mode of compound **3c** in the active region of  $\kappa$ -opioid receptor (PDB Code: 6B73).

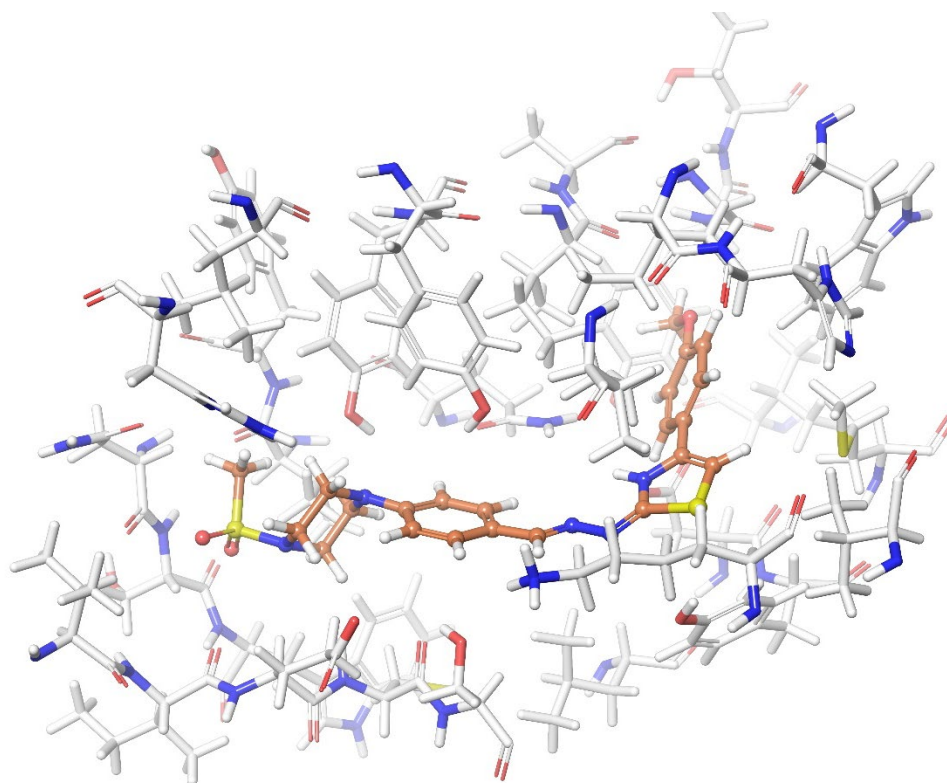

**Figure S62.** The three-dimensional interacting mode of compound **3c** in the active region of  $\kappa$ -opioid receptor. The ligand and significant residues of the active site of the receptor are presented by a tube model colored with orange and white, respectively (PDB Code: 6B73).

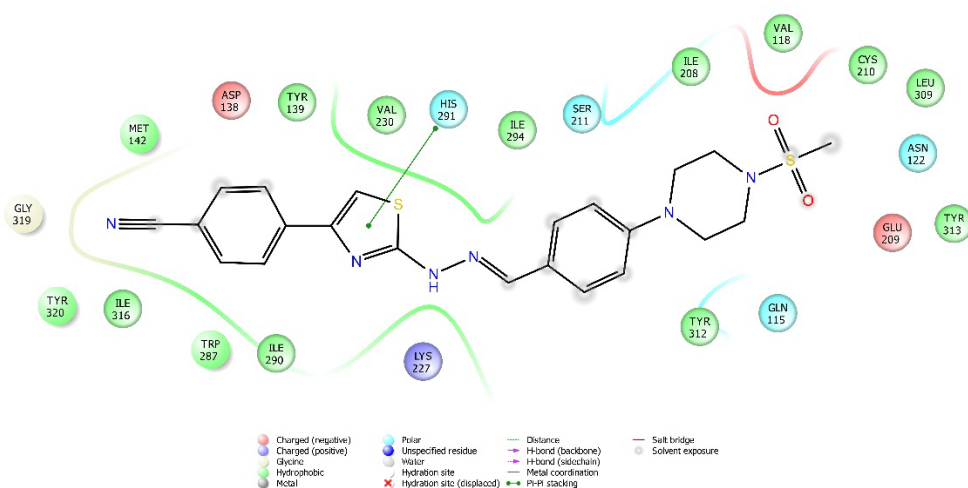

**Figure S63.** The two-dimensional interacting mode of compound **3d** in the active region of  $\kappa$ -opioid receptor (PDB Code: 6B73).

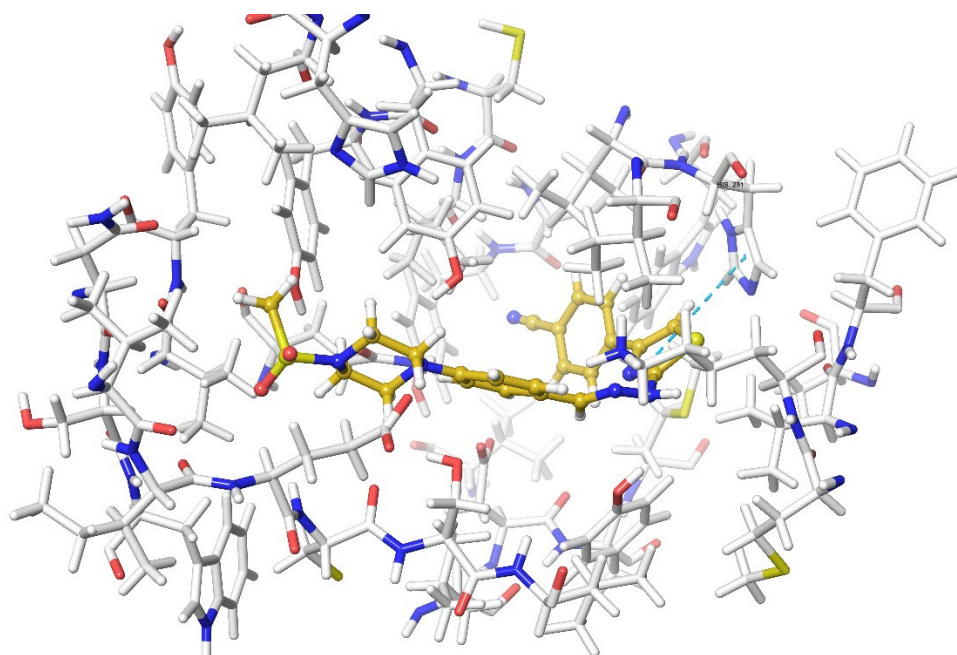

**Figure S64.** The three-dimensional interacting mode of compound **3d** in the active region of  $\kappa$ -opioid receptor. The ligand and significant residues of the active site of the receptor are presented by a tube model colored with yellow and white, respectively (PDB Code: 6B73).

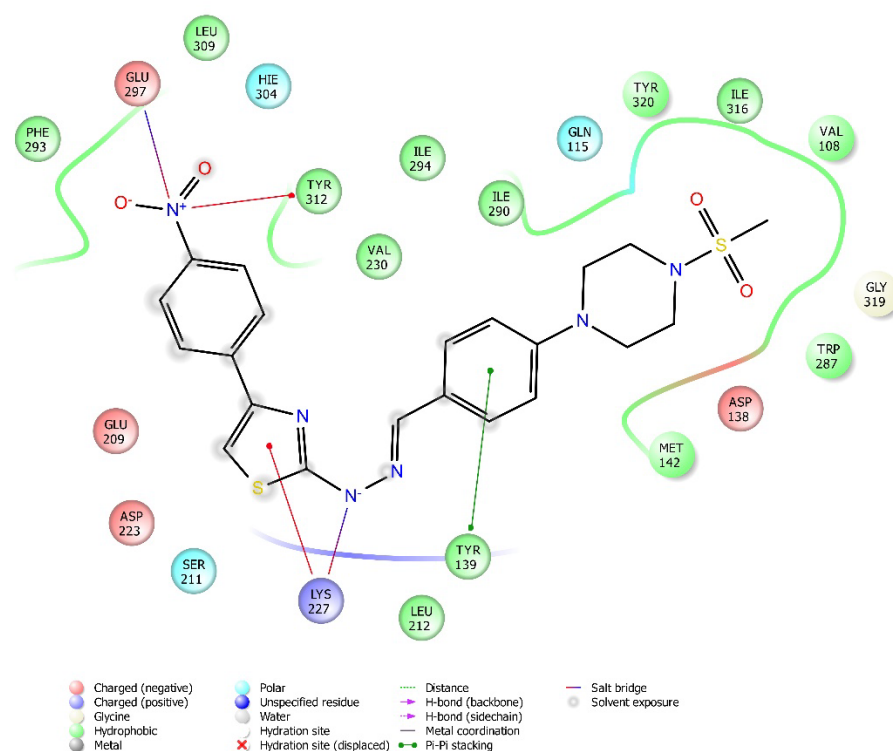

**Figure S65.** The two-dimensional interacting mode of compound **3e** in the active region of  $\kappa$ -opioid receptor (PDB Code: 6B73).

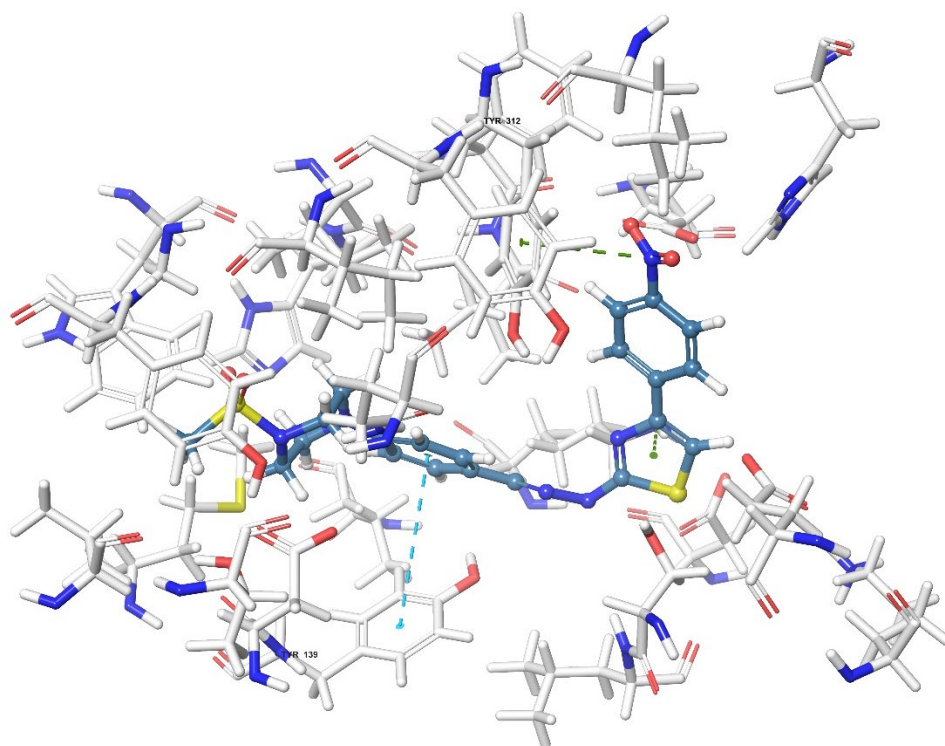

**Figure S66.** The three-dimensional interacting mode of compound **3e** in the active region of  $\kappa$ -opioid receptor. The ligand and significant residues of the active site of the receptor are presented by a tube model colored with blue and white, respectively (PDB Code: 6B73).

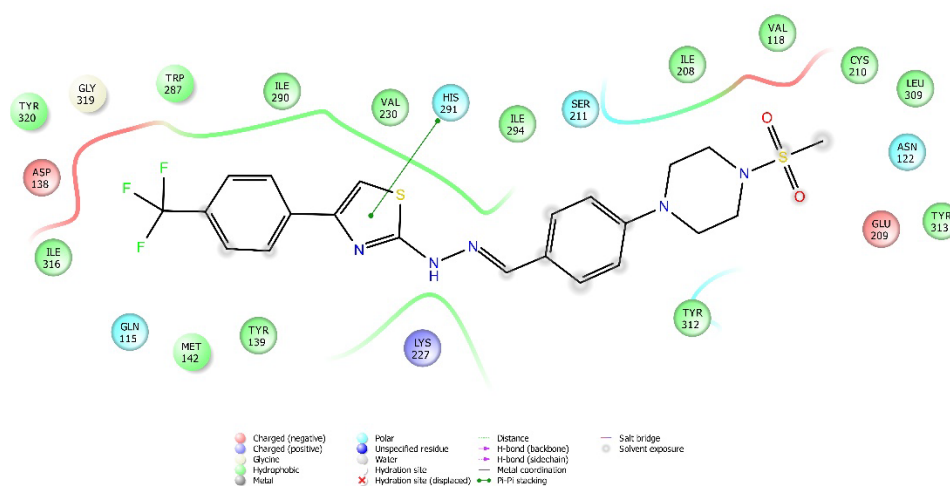

**Figure S67.** The two-dimensional interacting mode of compound **3h** in the active region of  $\kappa$ -opioid receptor (PDB Code: 6B73).

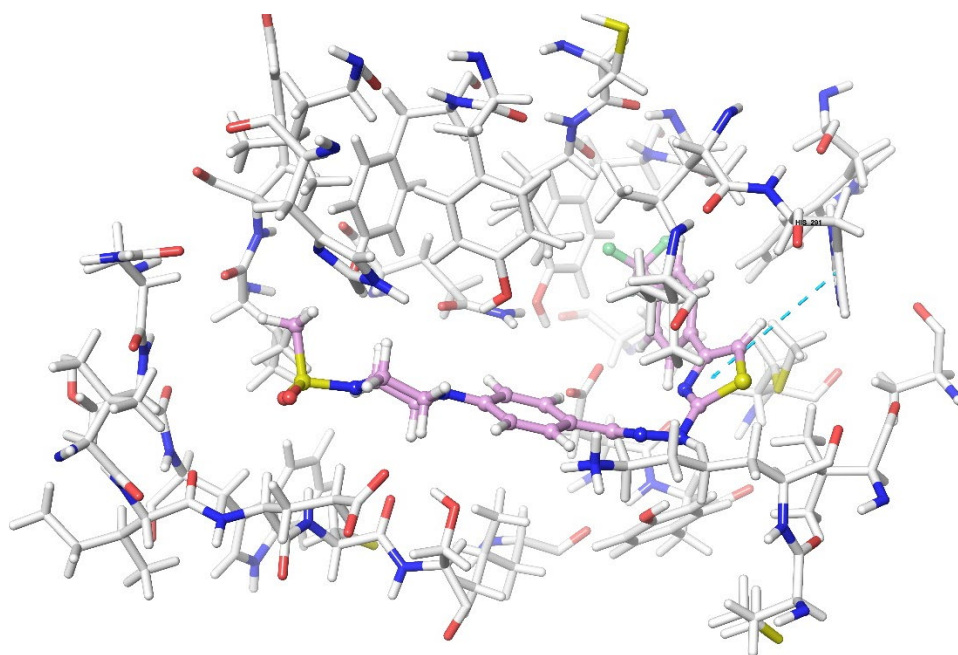

**Figure S68.** The three-dimensional interacting mode of compound **3h** in the active region of  $\kappa$ -opioid receptor. The ligand and significant residues of the active site of the receptor are presented by a tube model colored with pink and white, respectively (PDB Code: 6B73).
